# Supplementary material
Source: PubMed Central journal article supplement (PMC2948233)

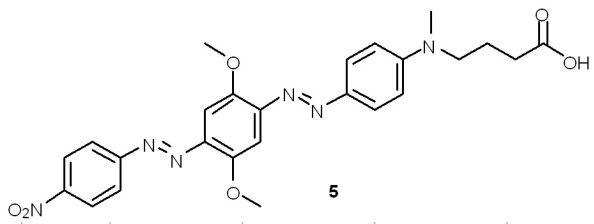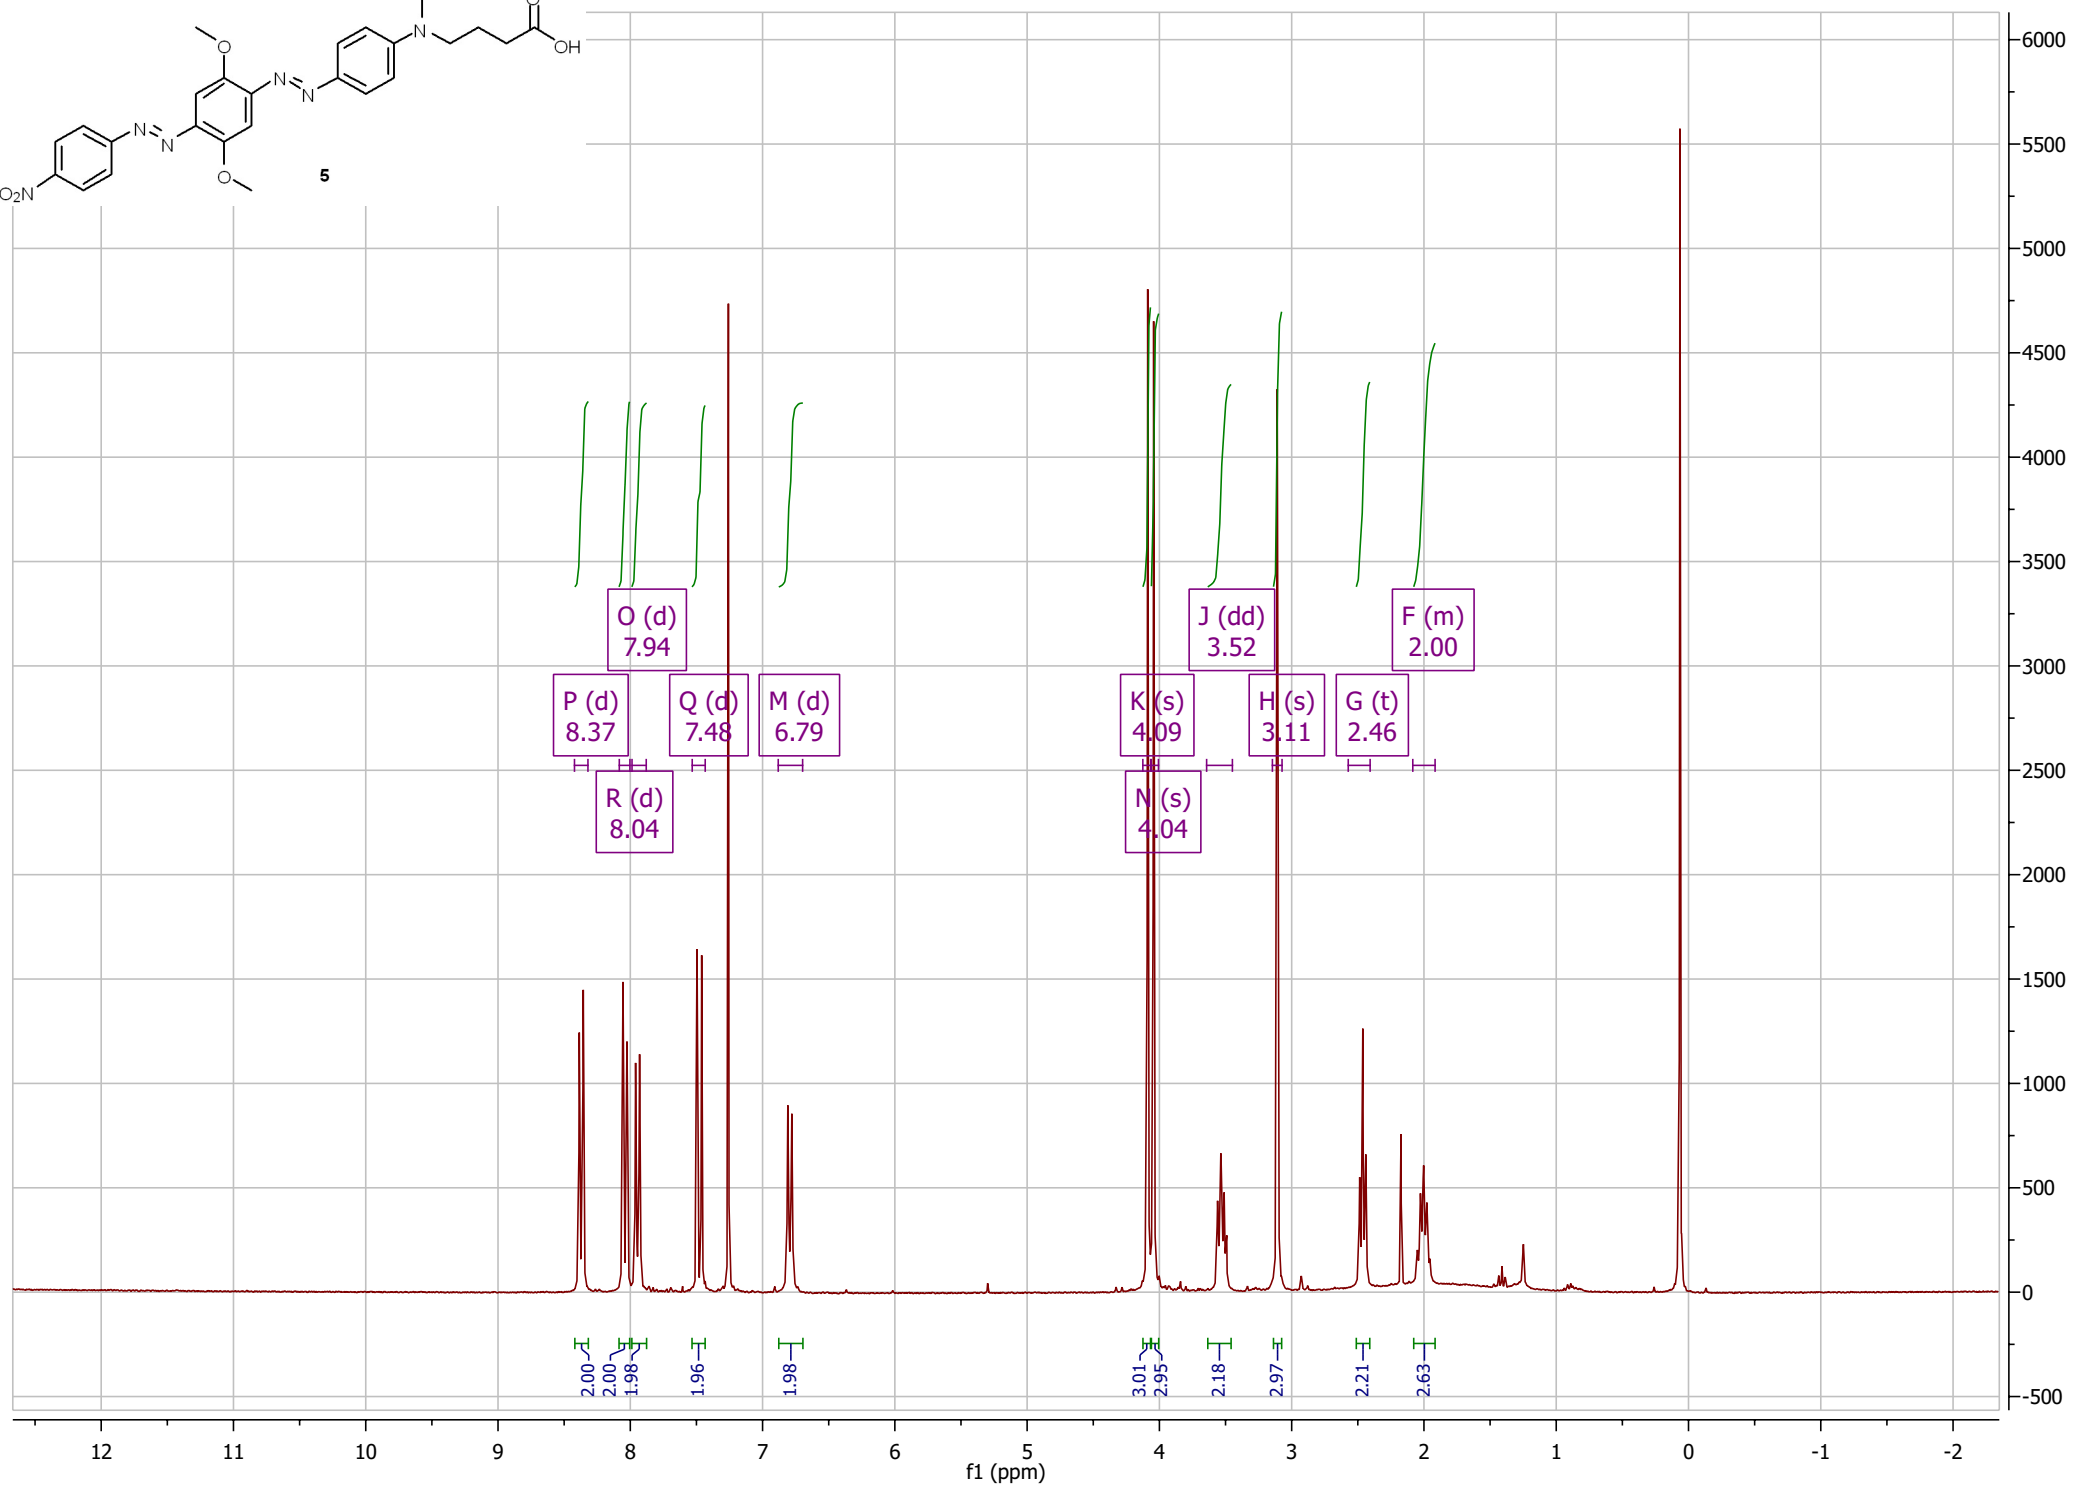

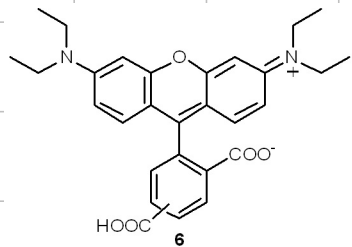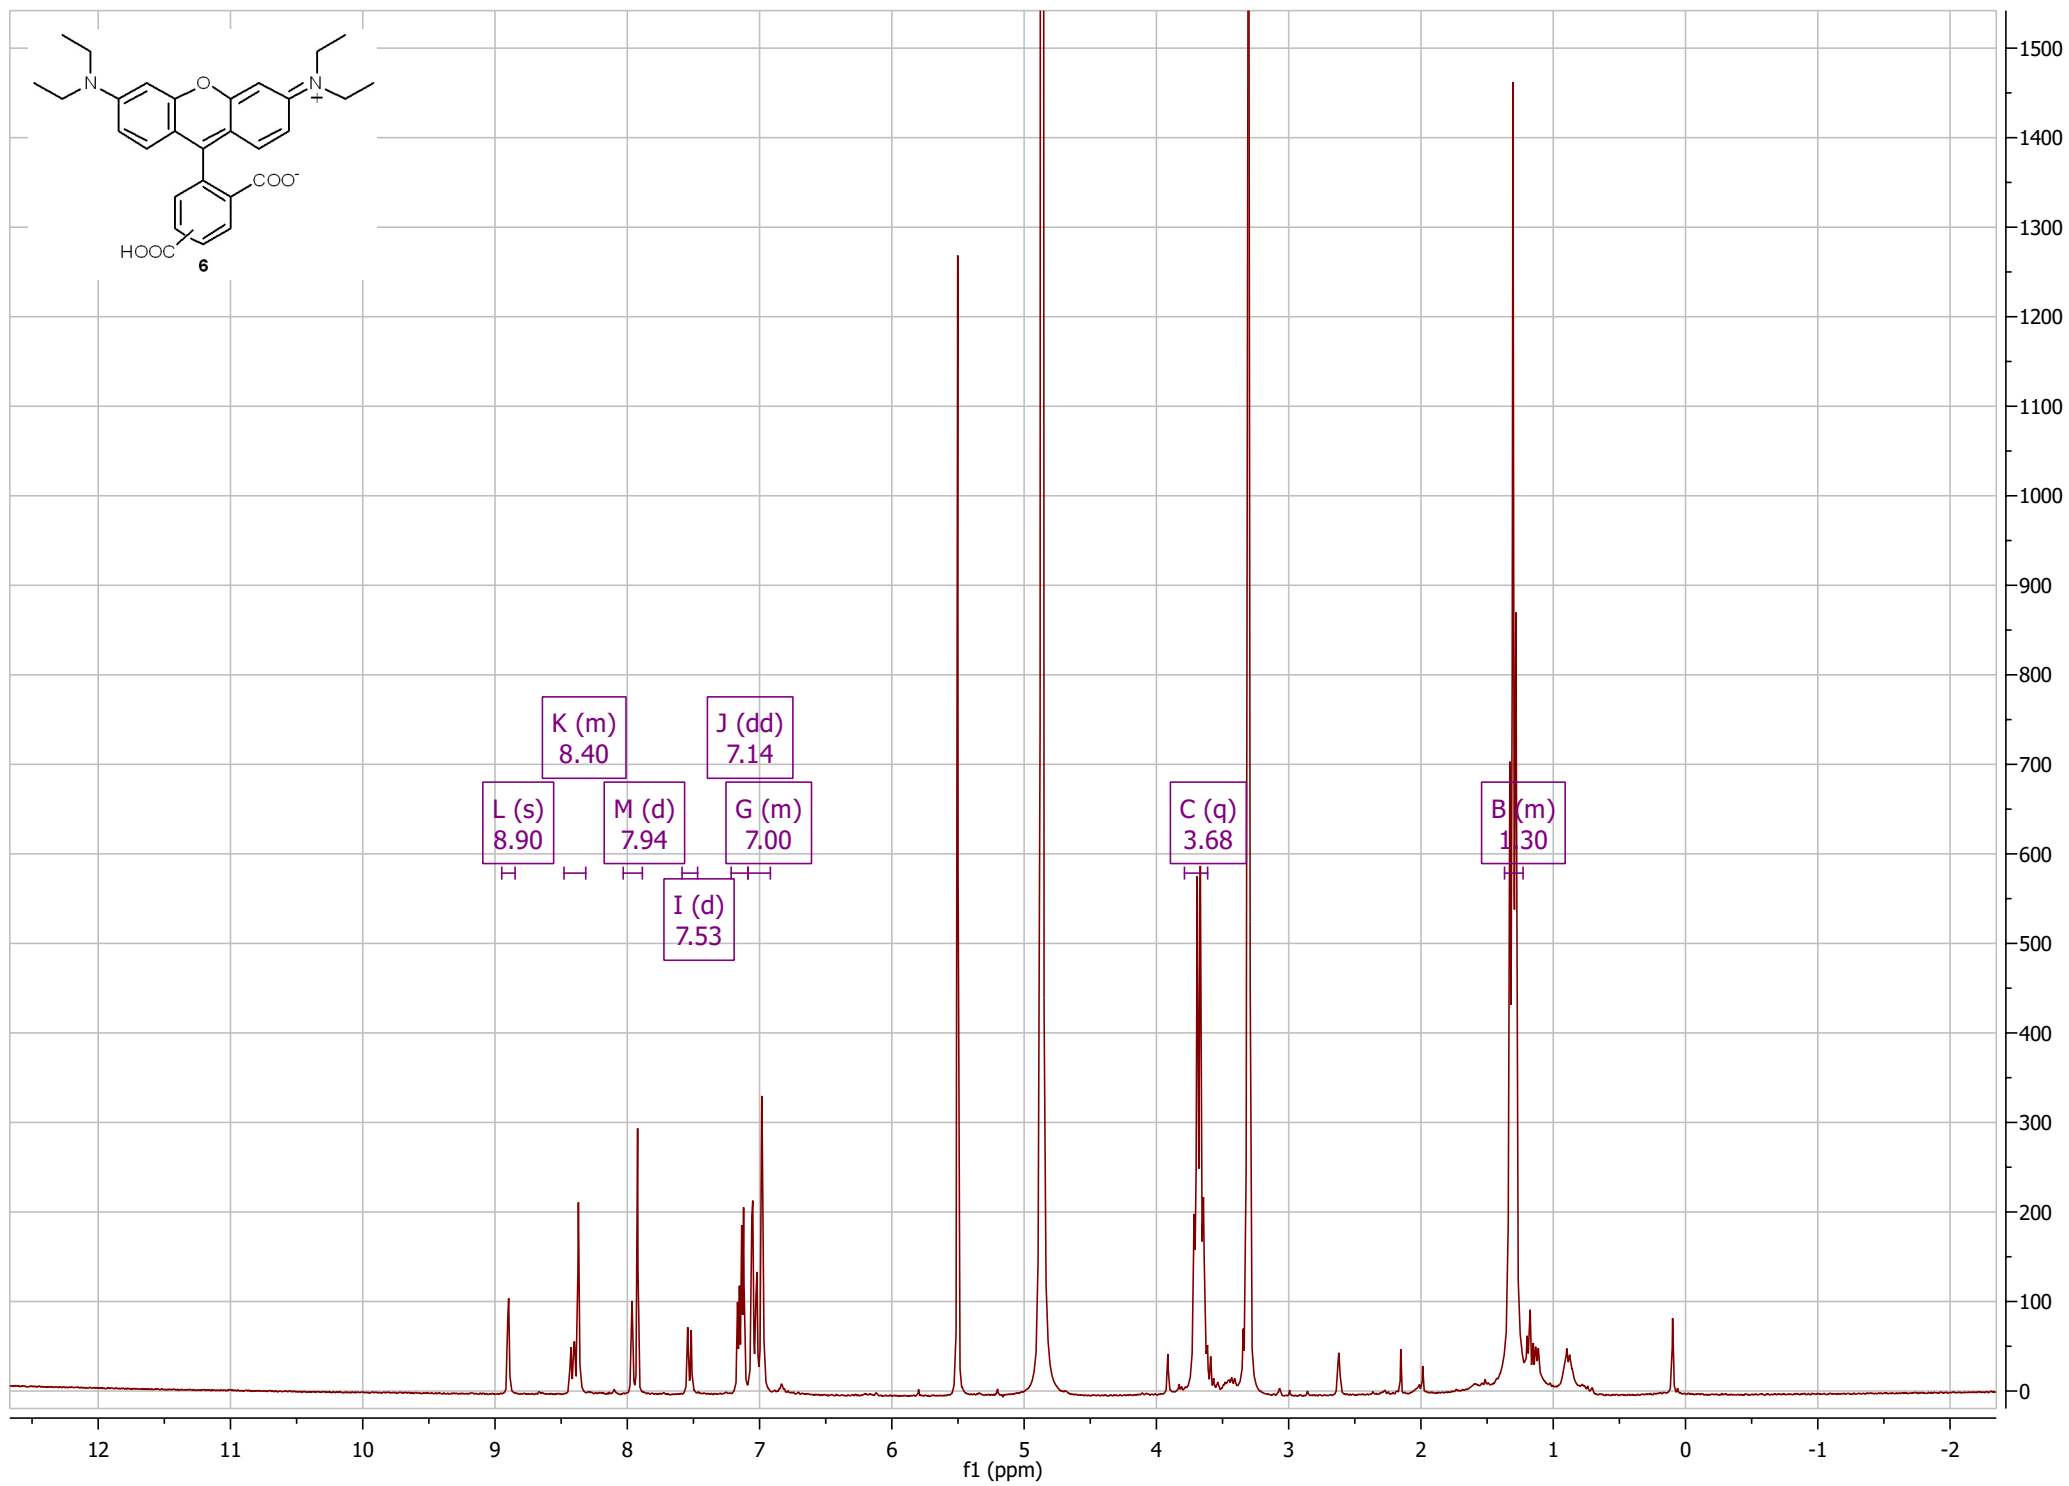

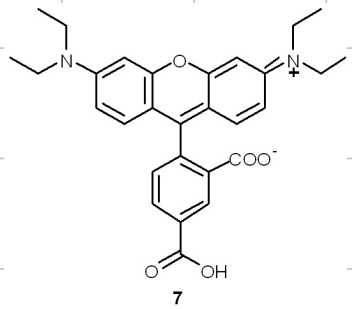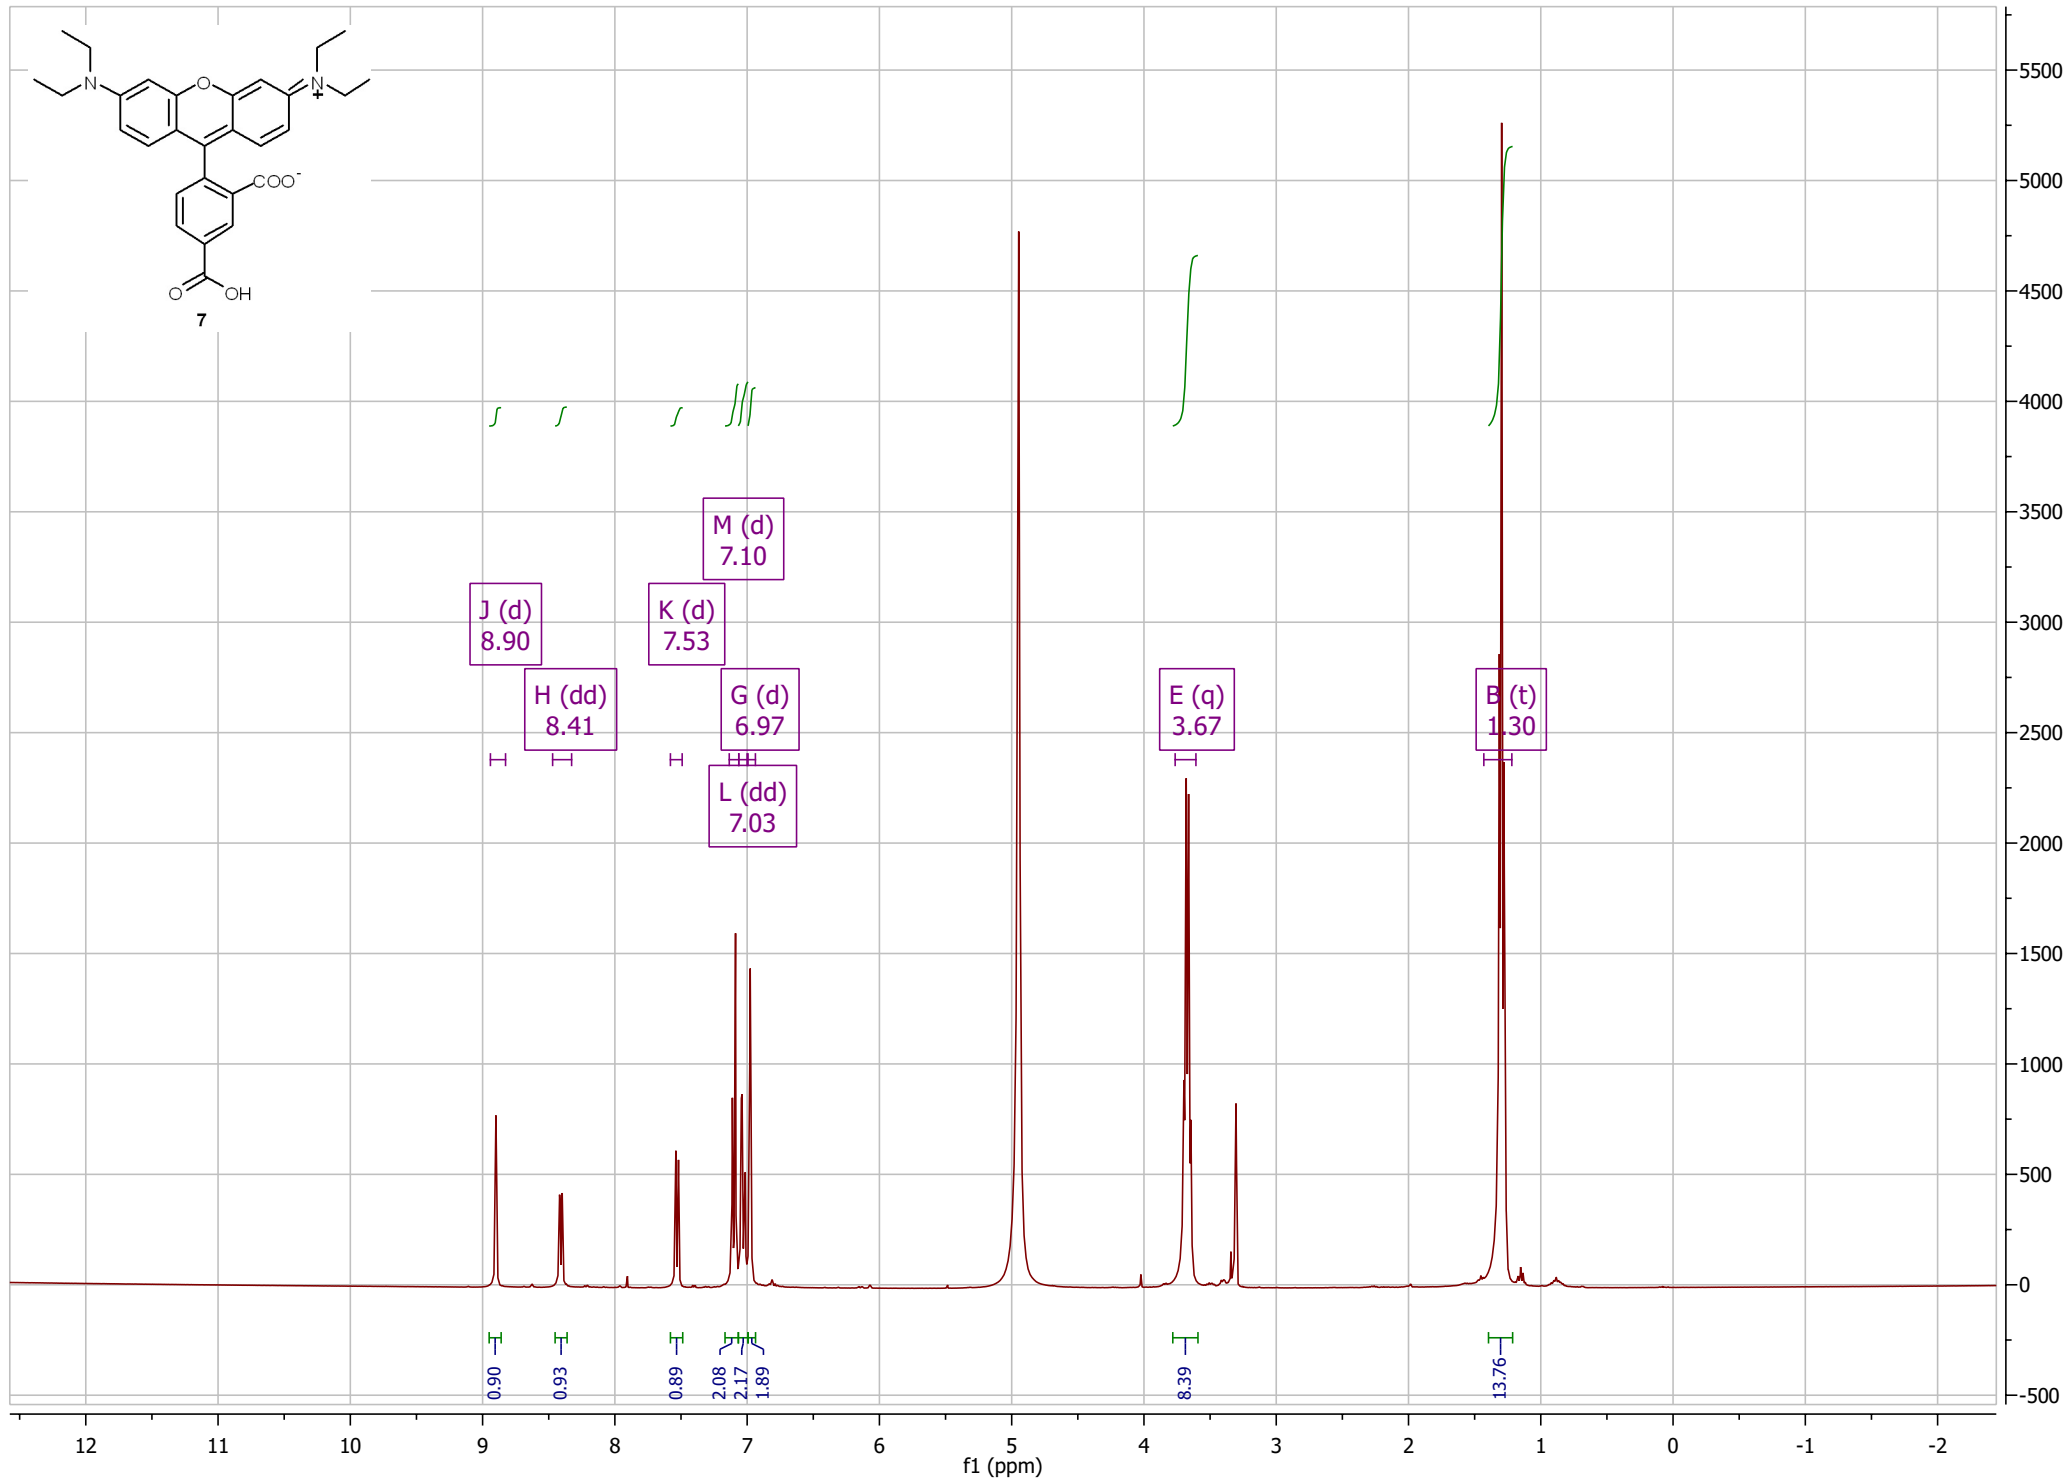

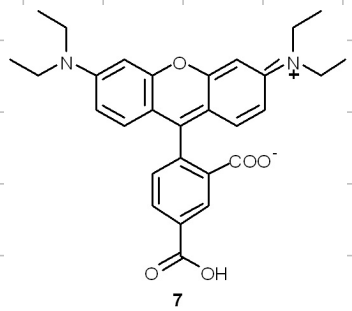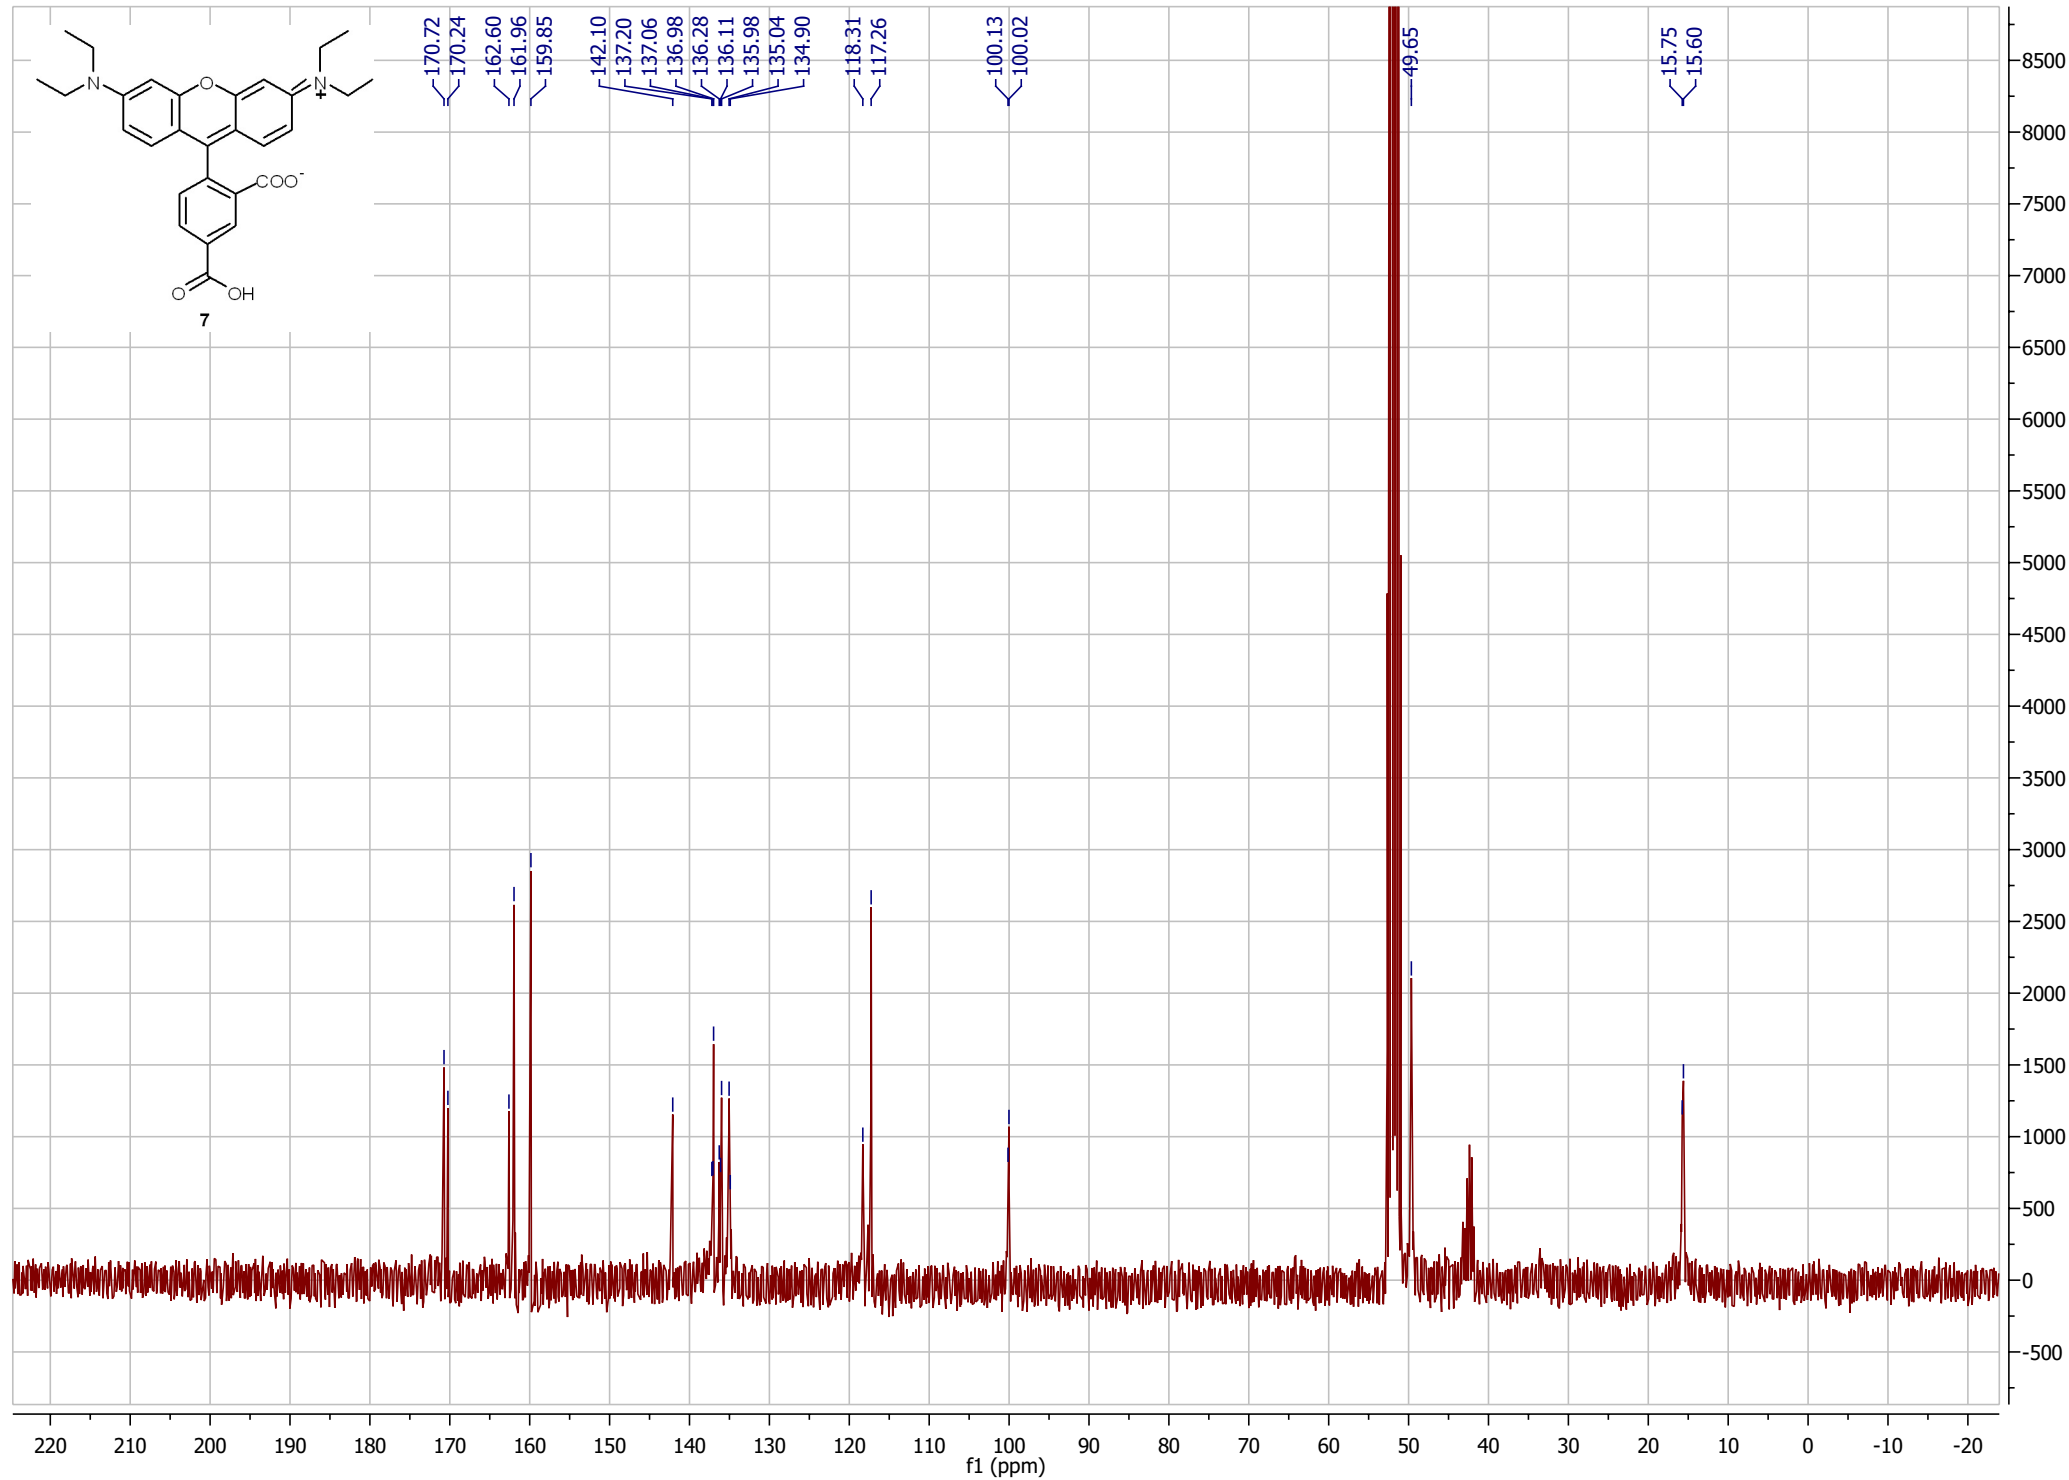

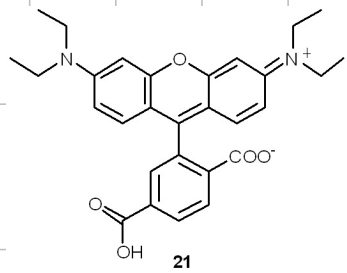

21

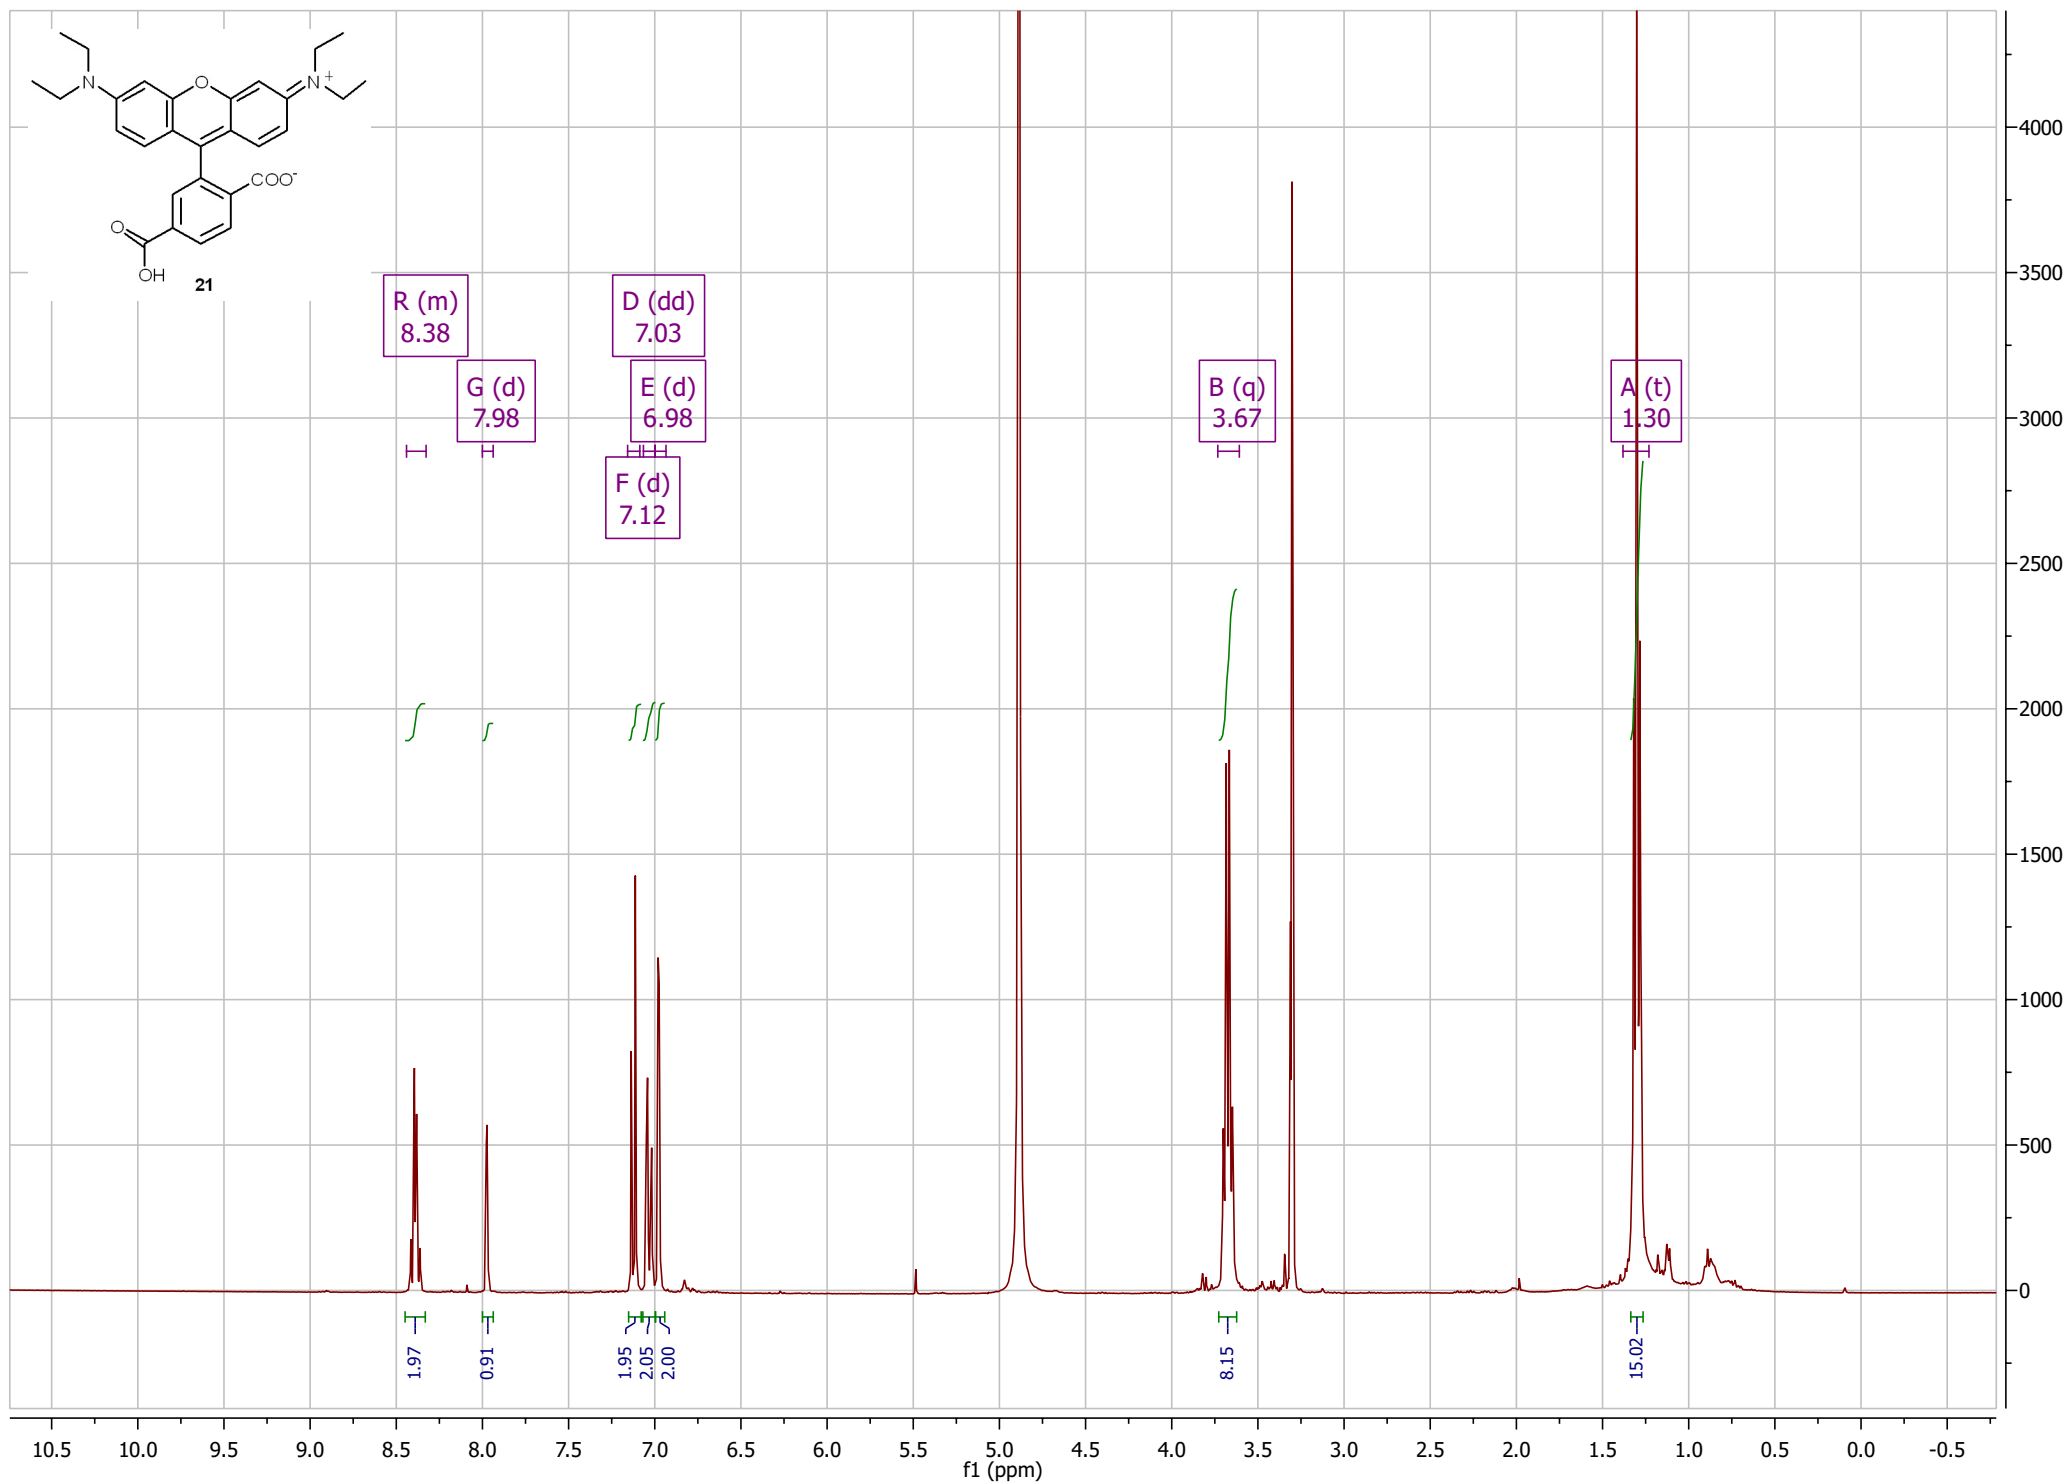

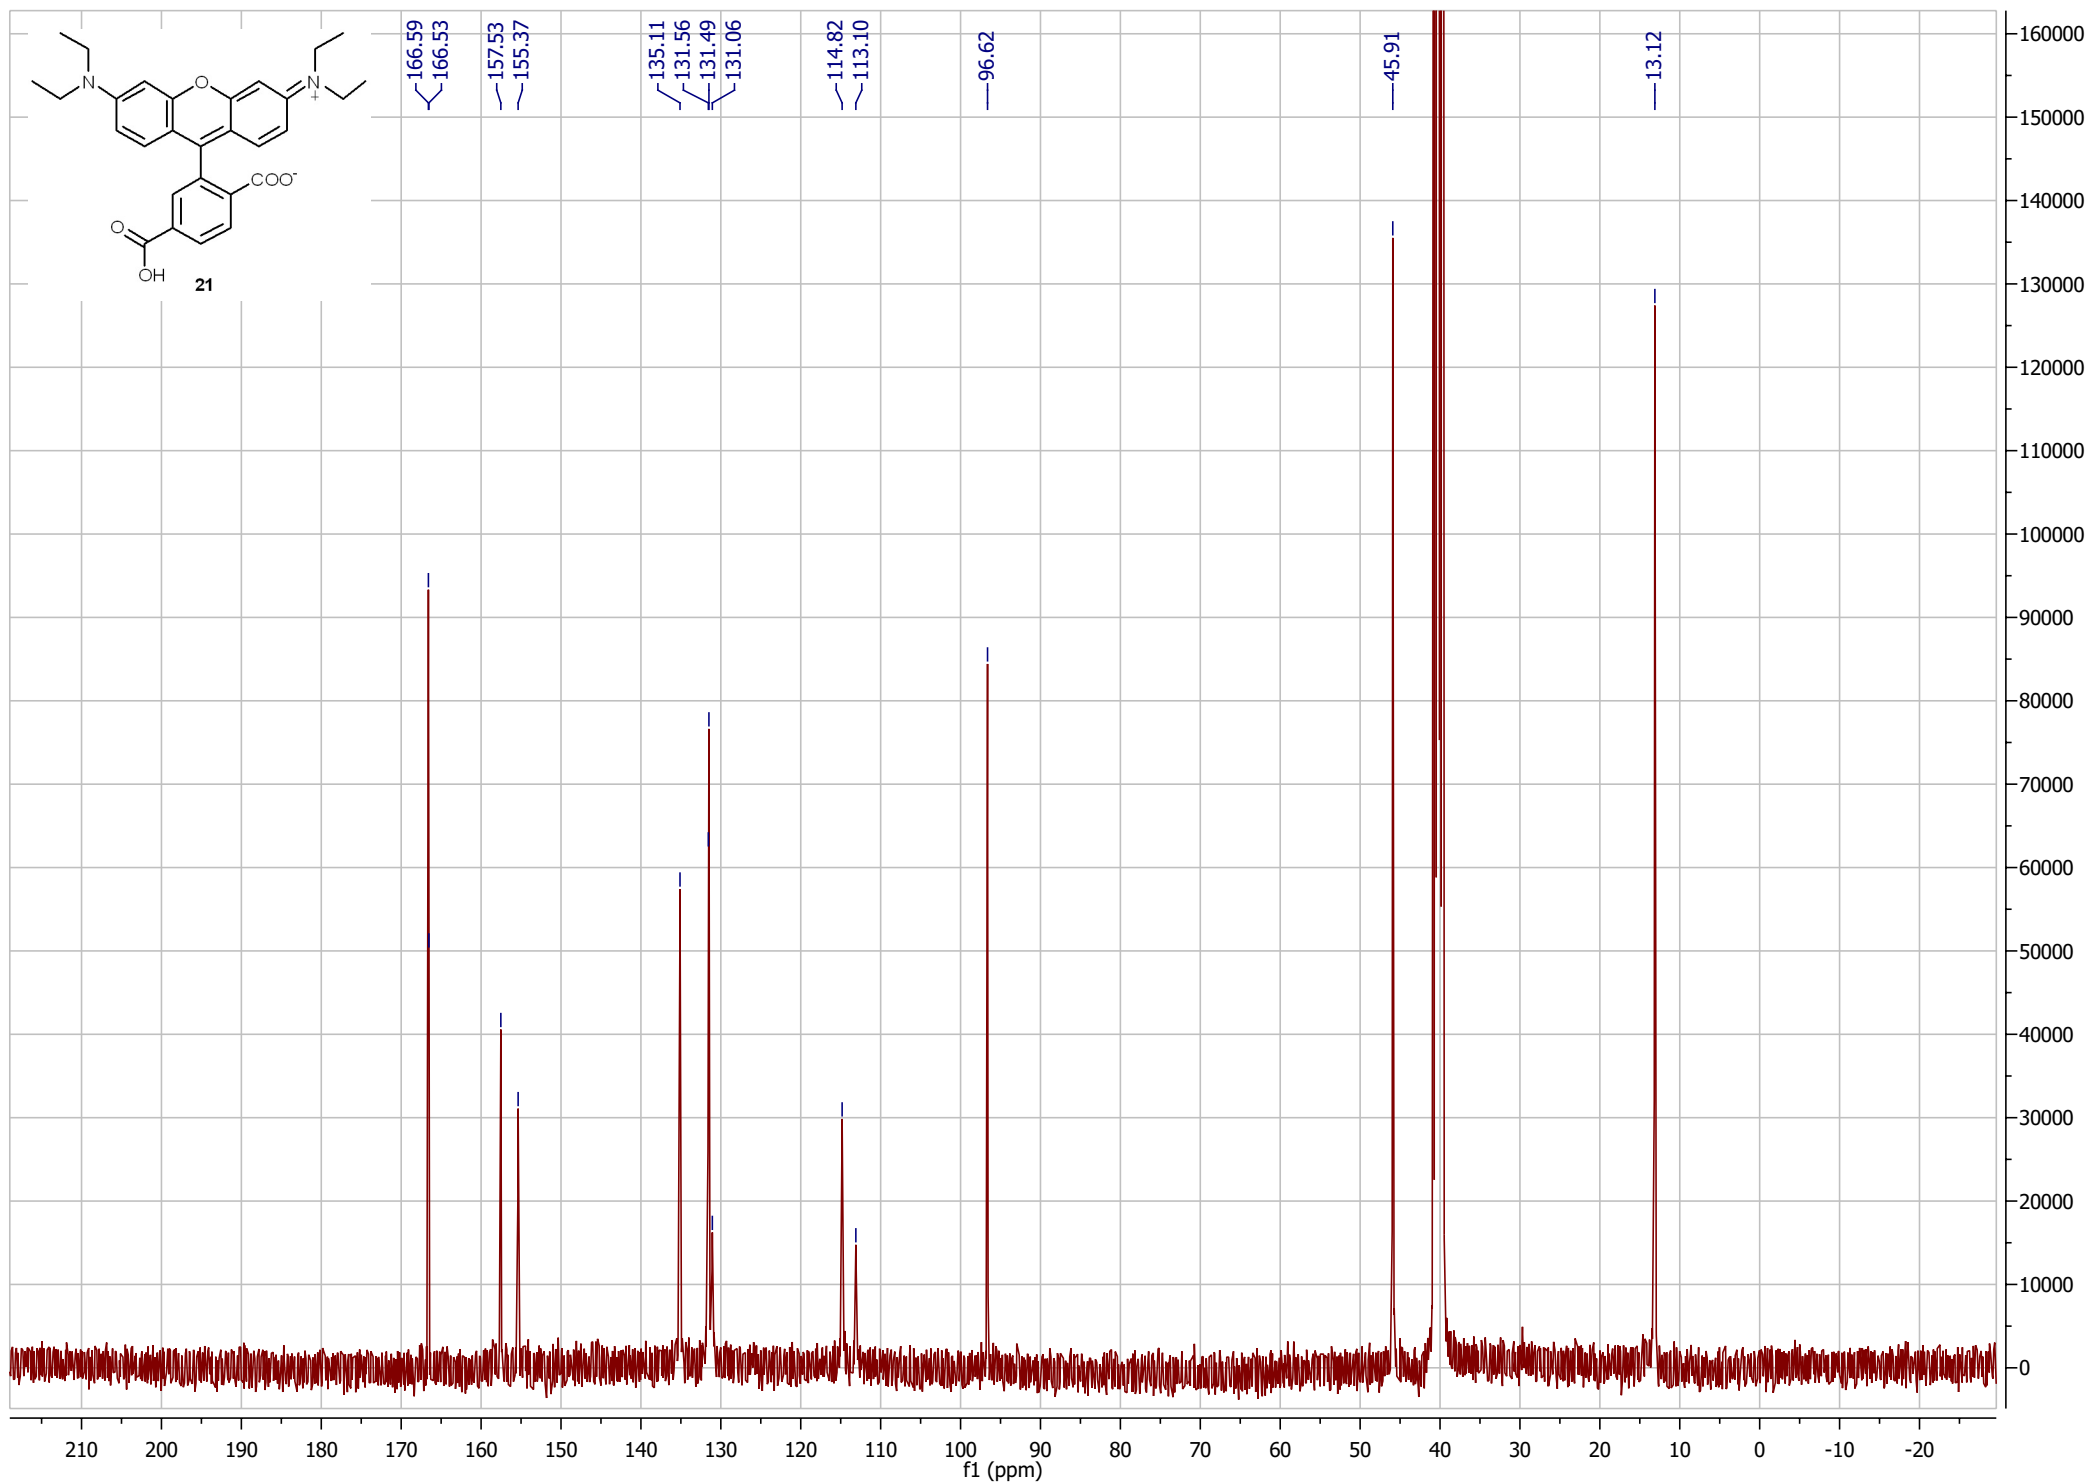

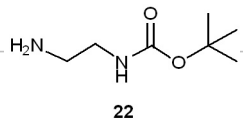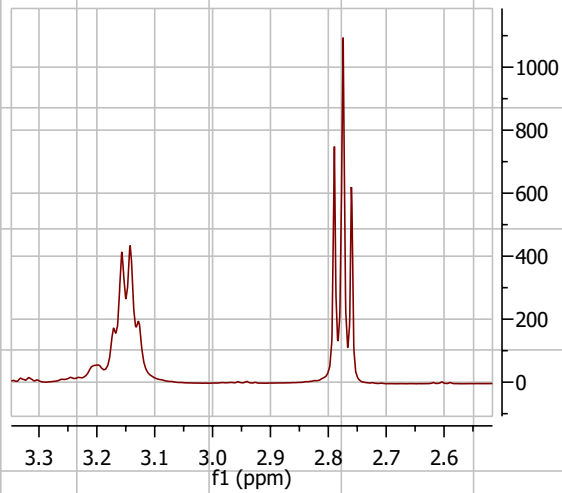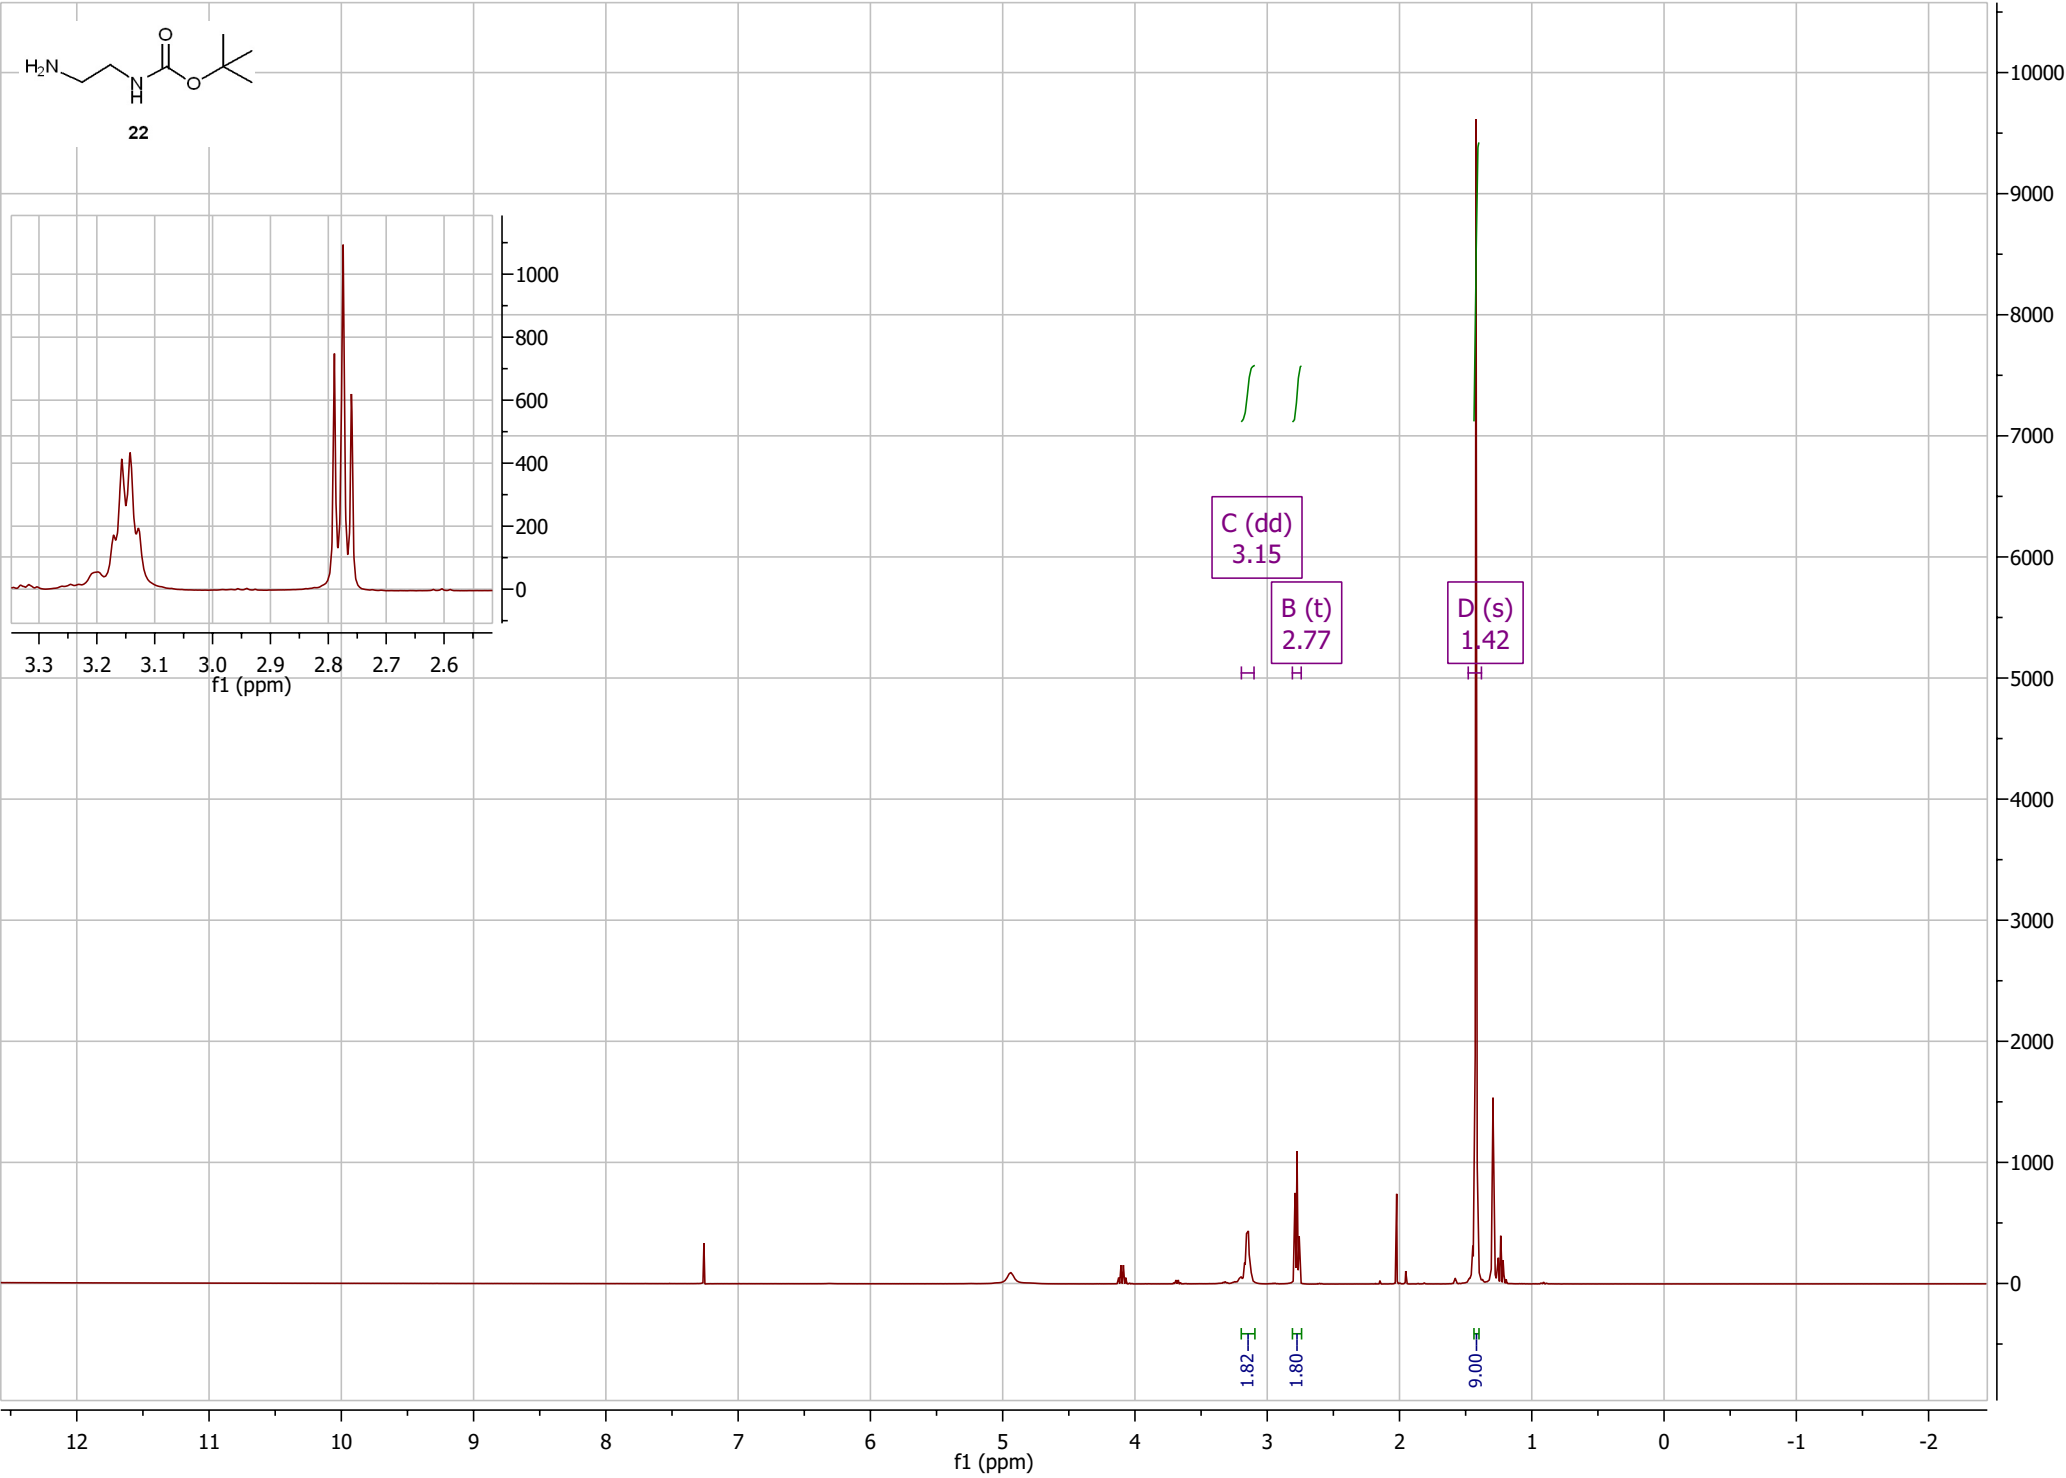

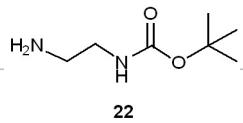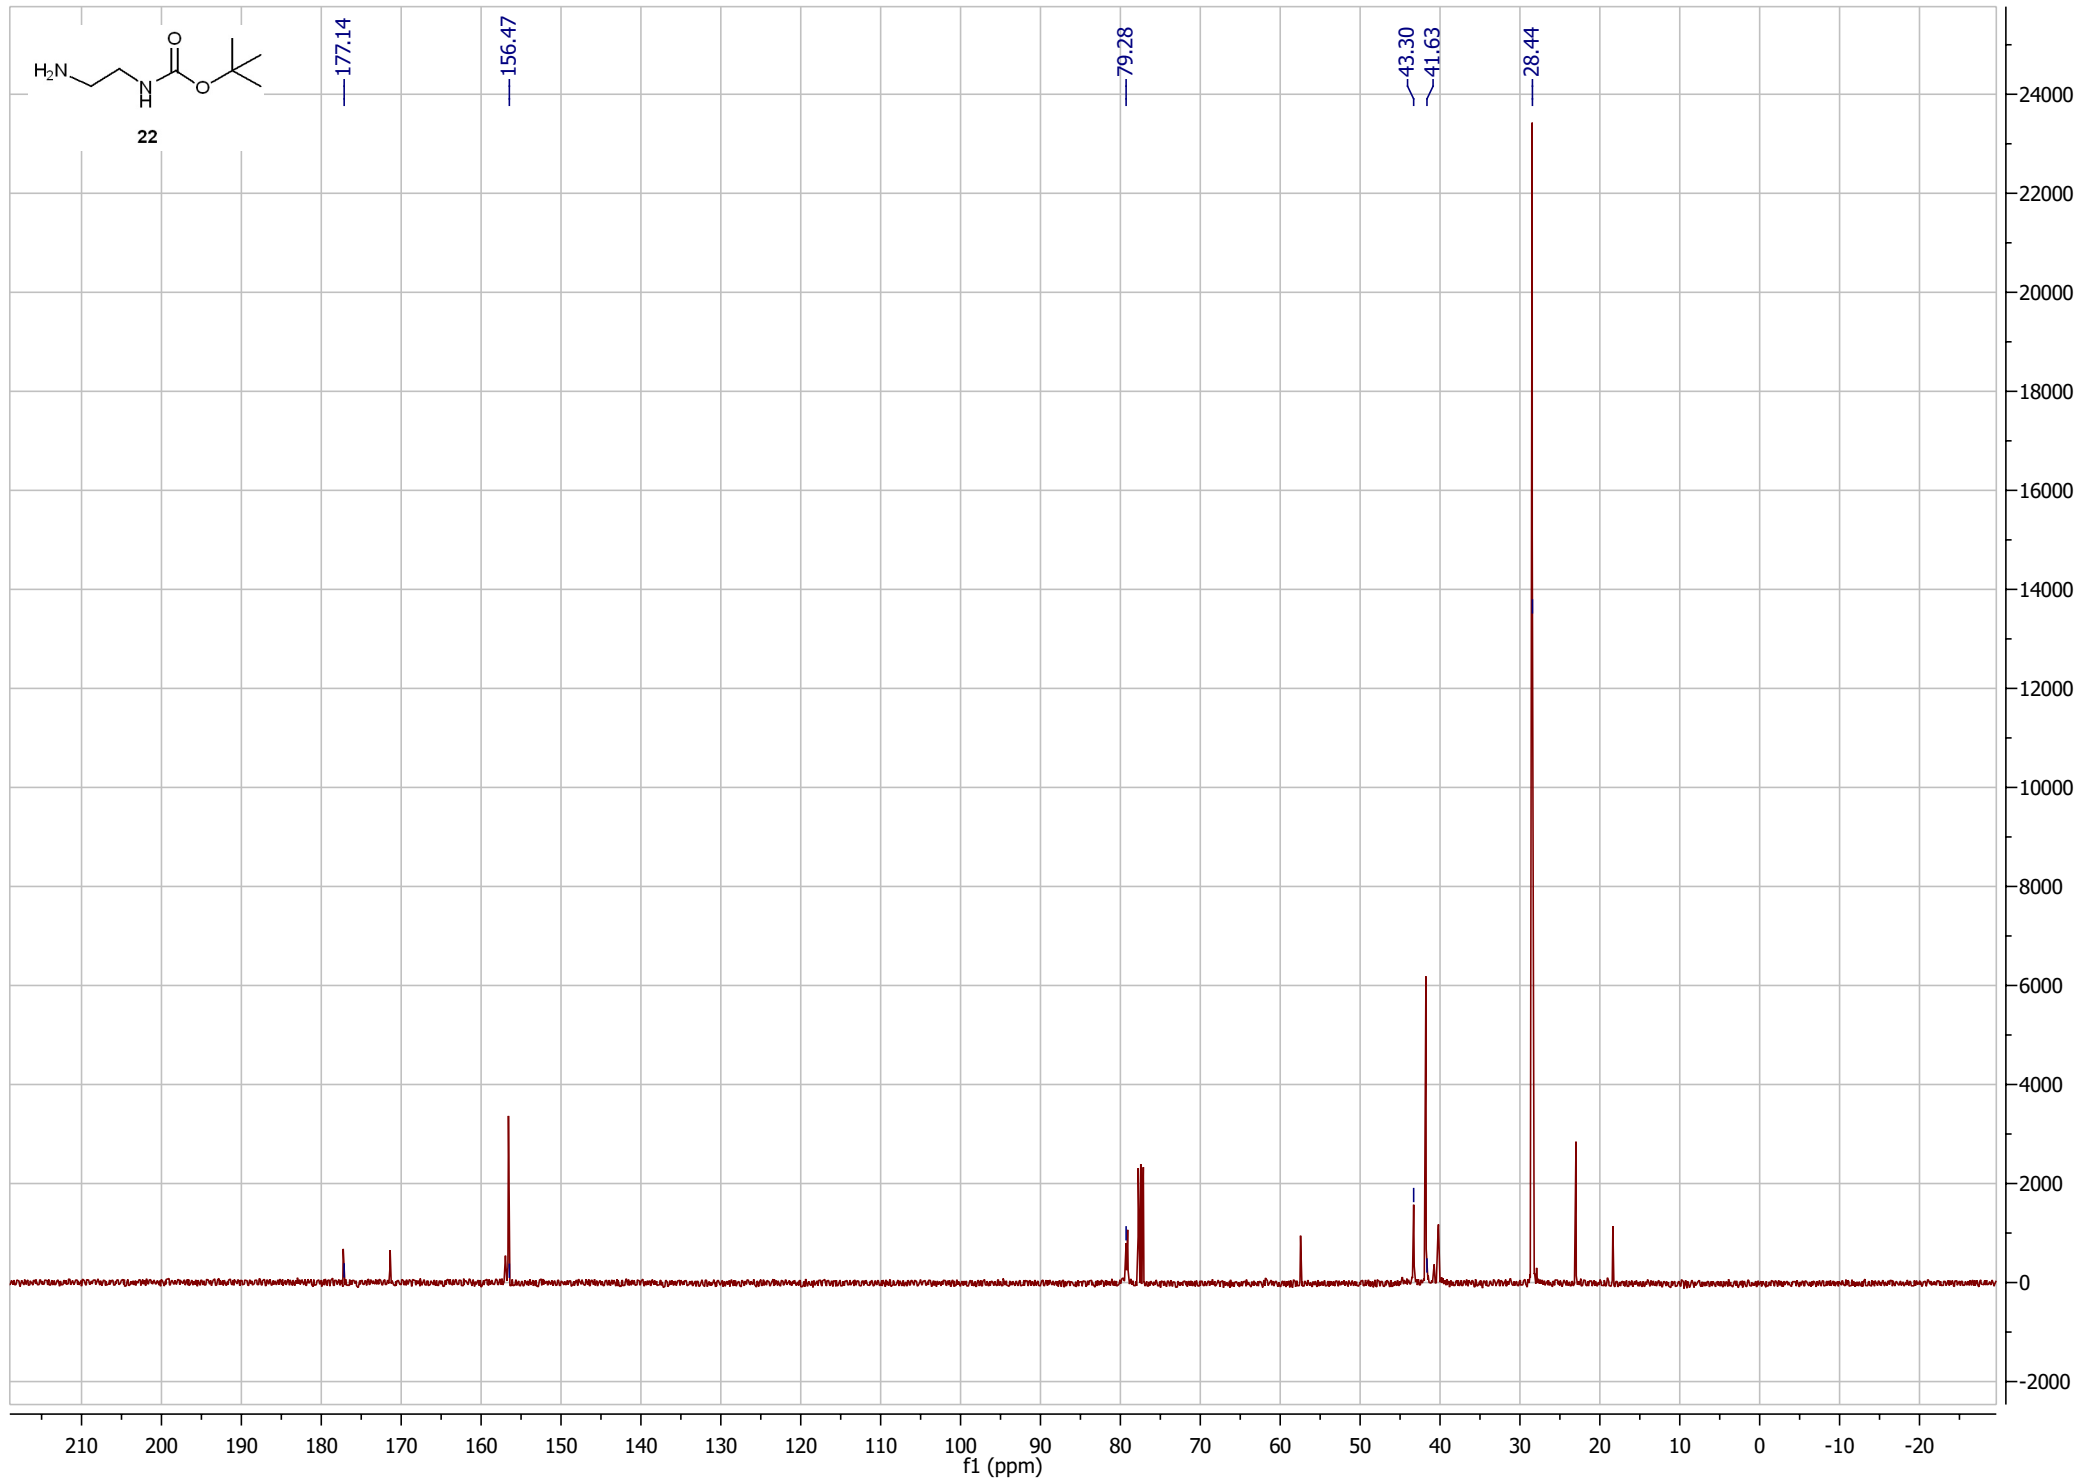



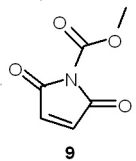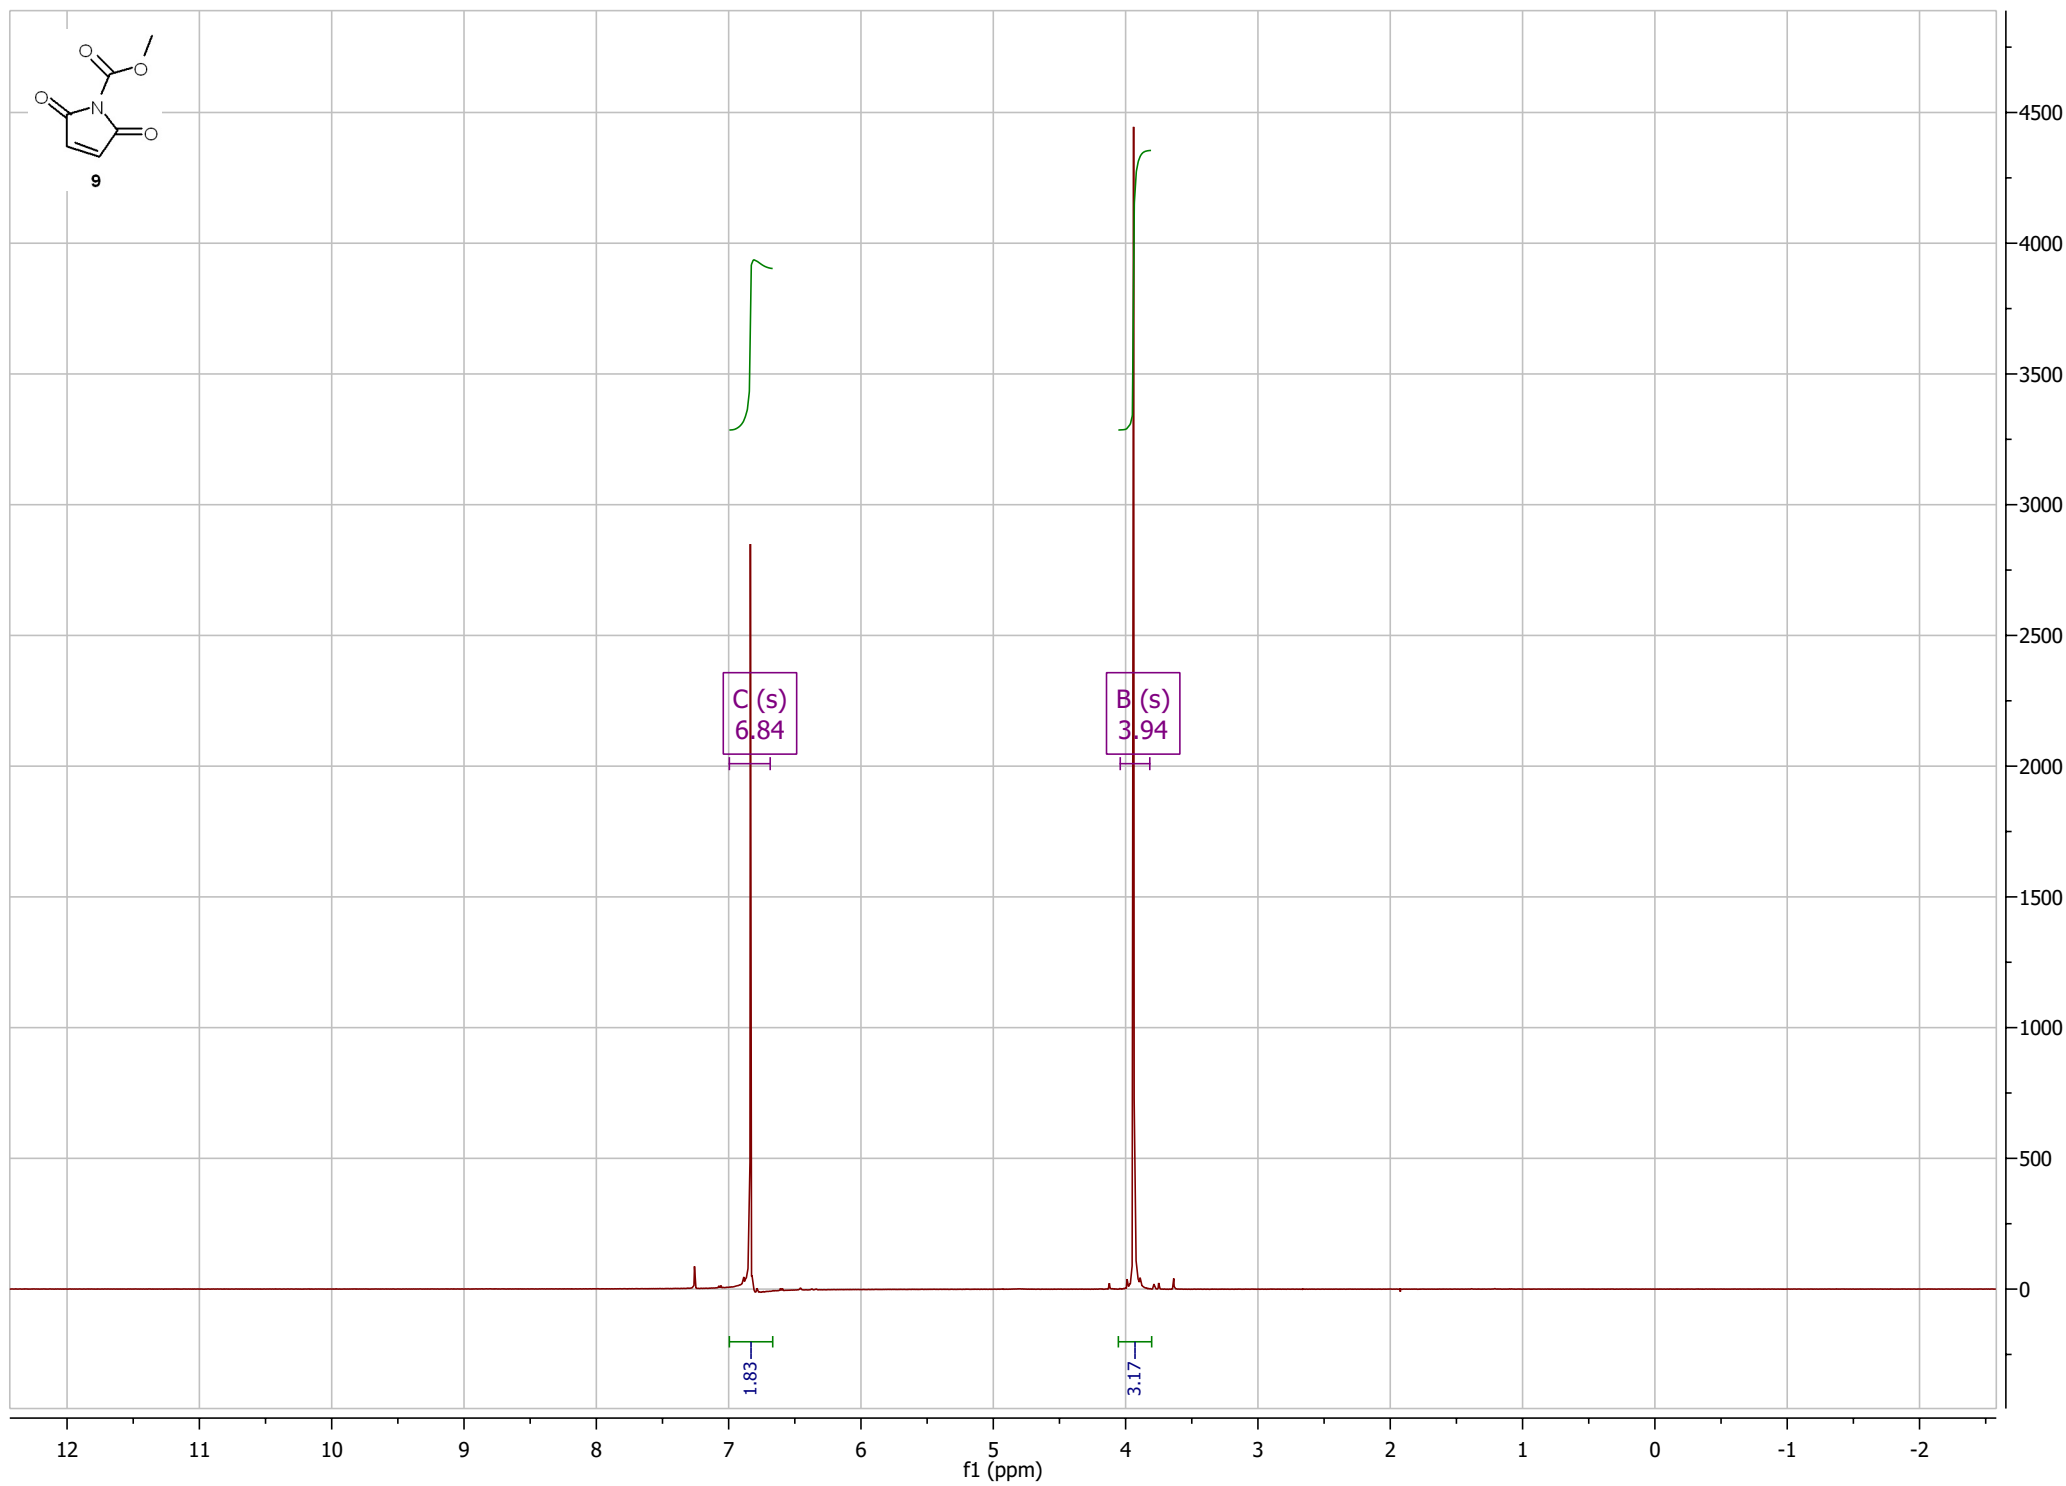

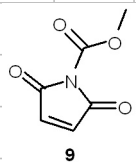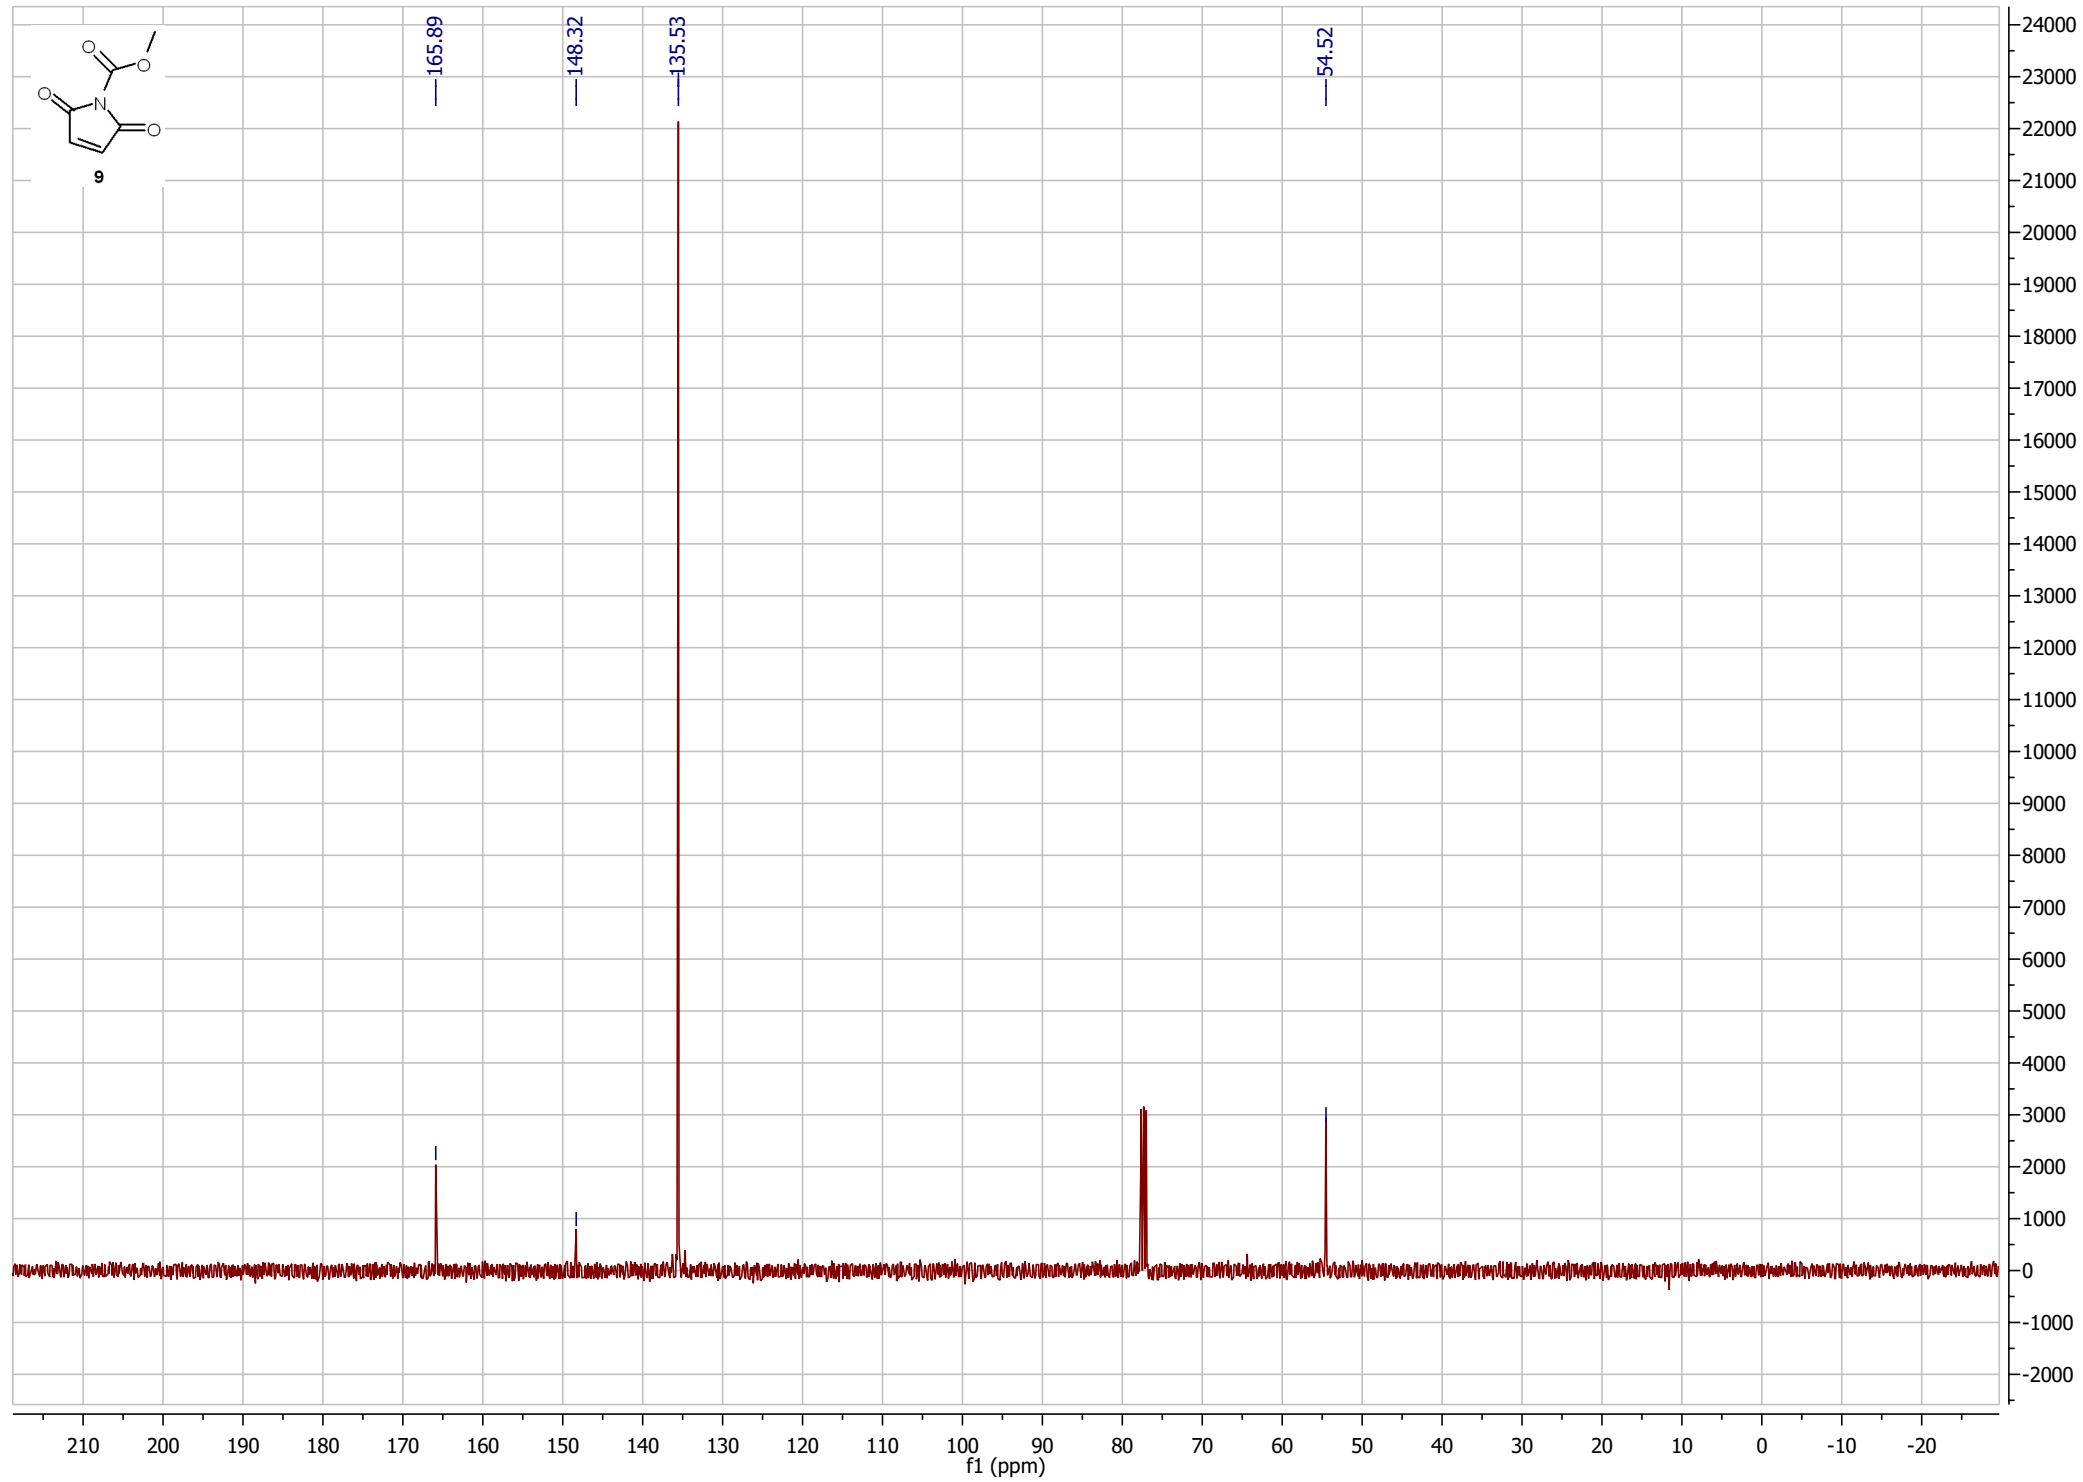

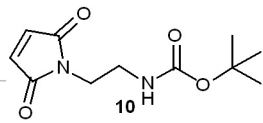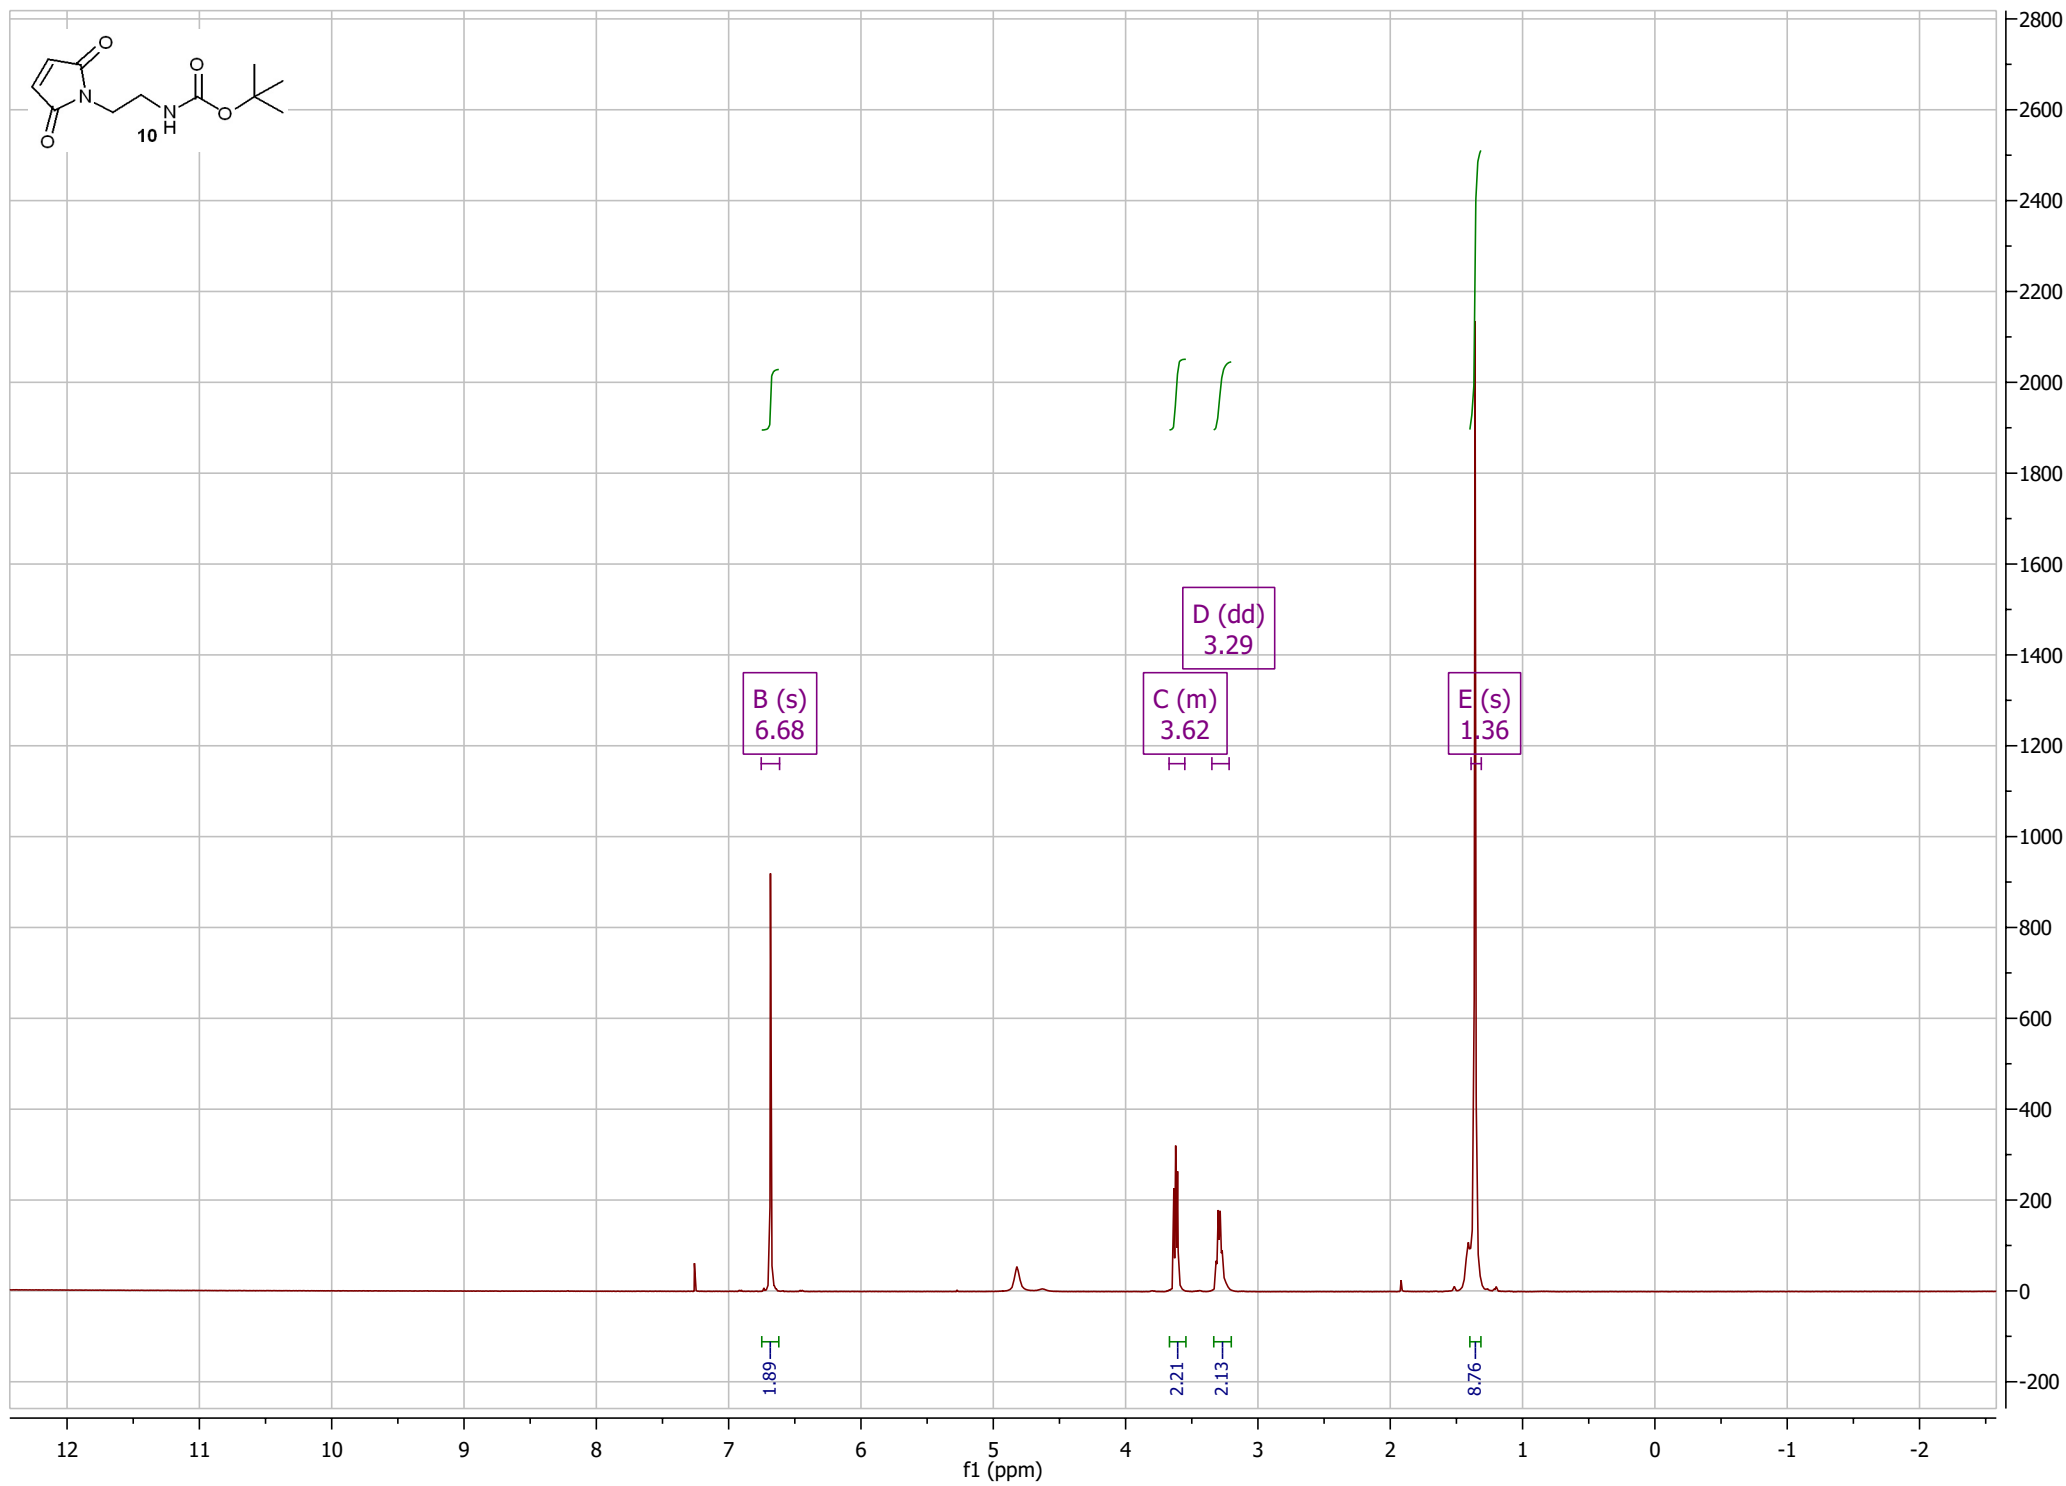

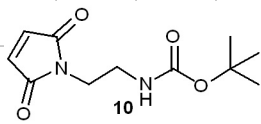

—171.04

—134.37

—79.67

—39.53

—38.19

—28.51

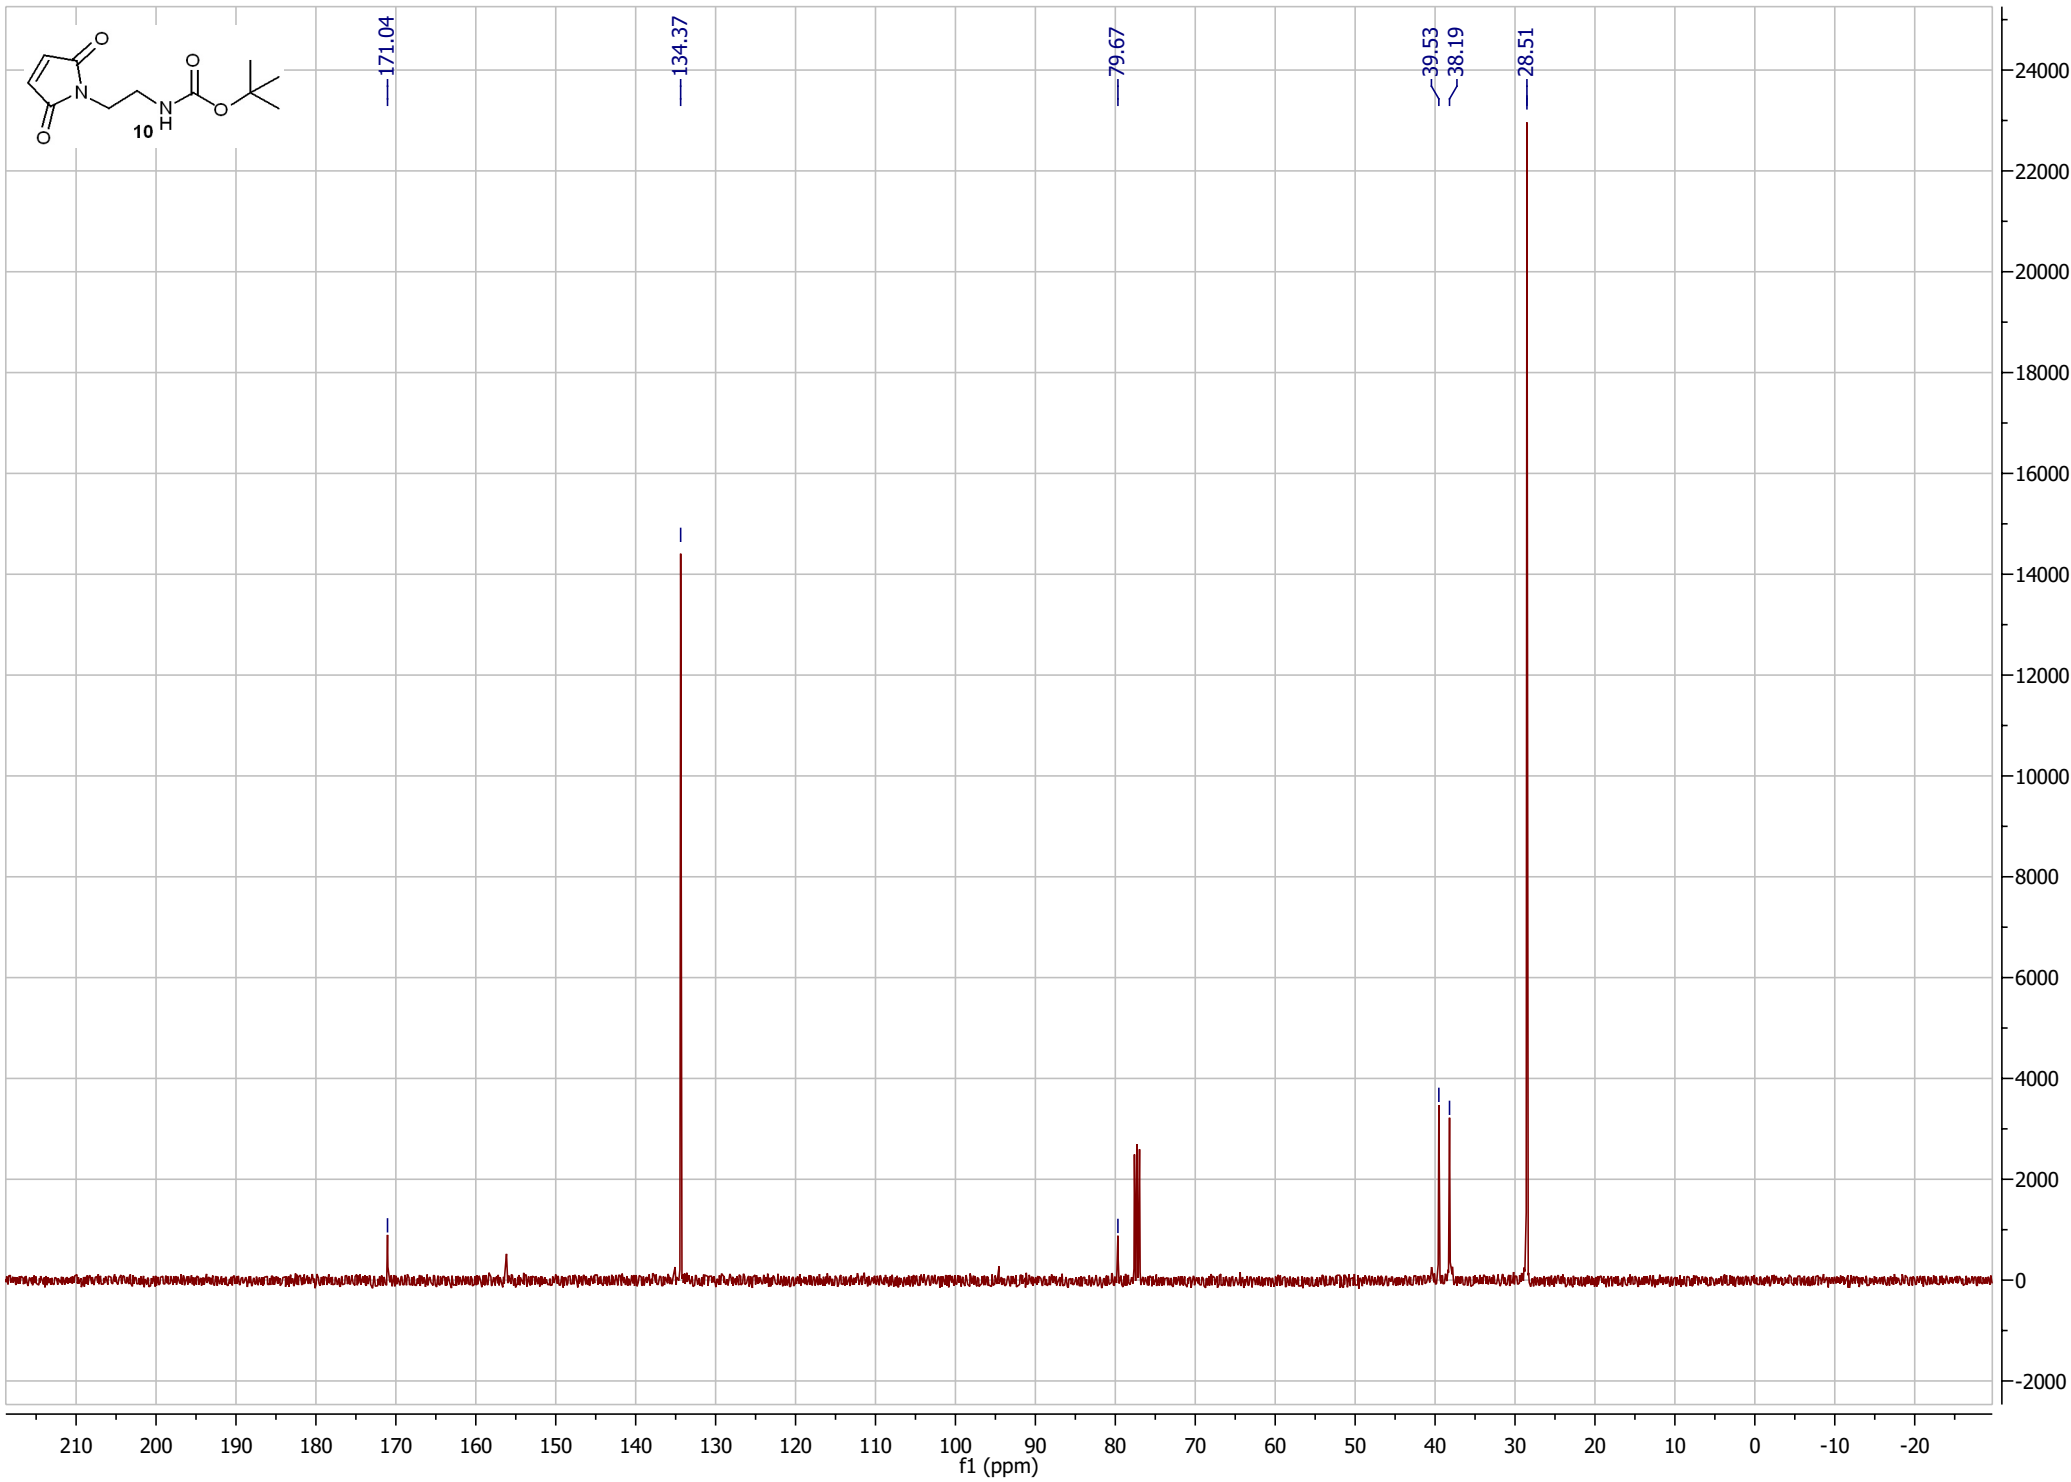

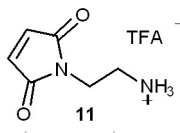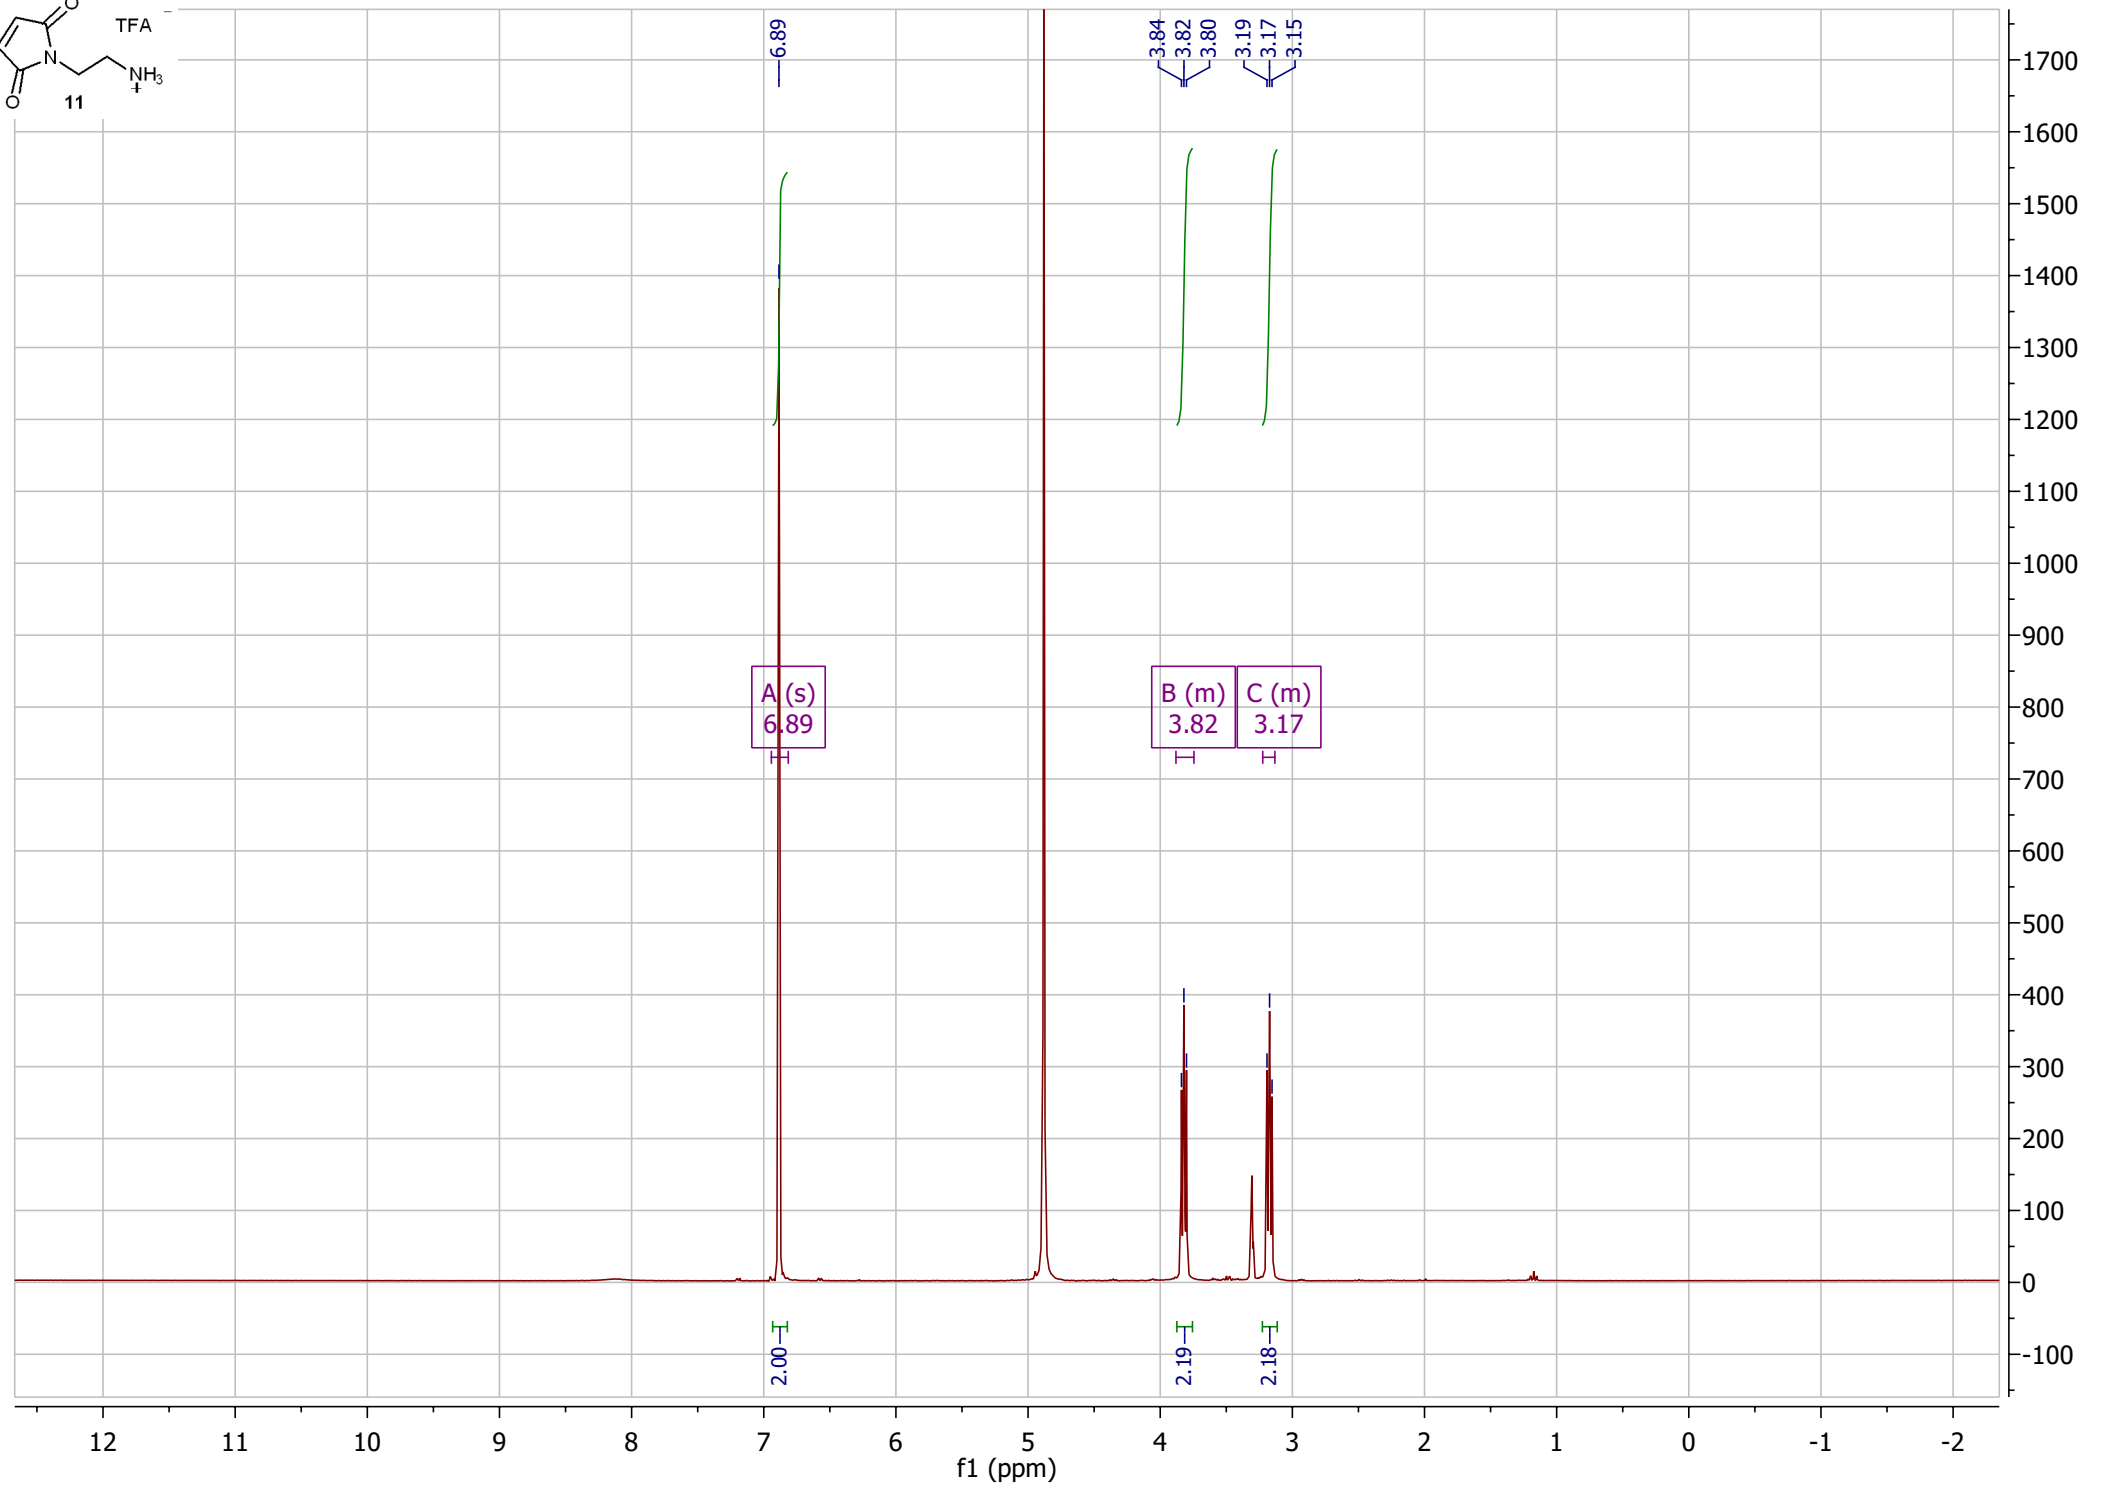

A (s)  
6.89  
H

B (m)  
3.82  
H

C (m)  
3.17  
H

2.00

2.19

2.18

f1 (ppm)

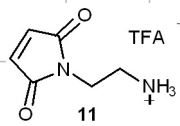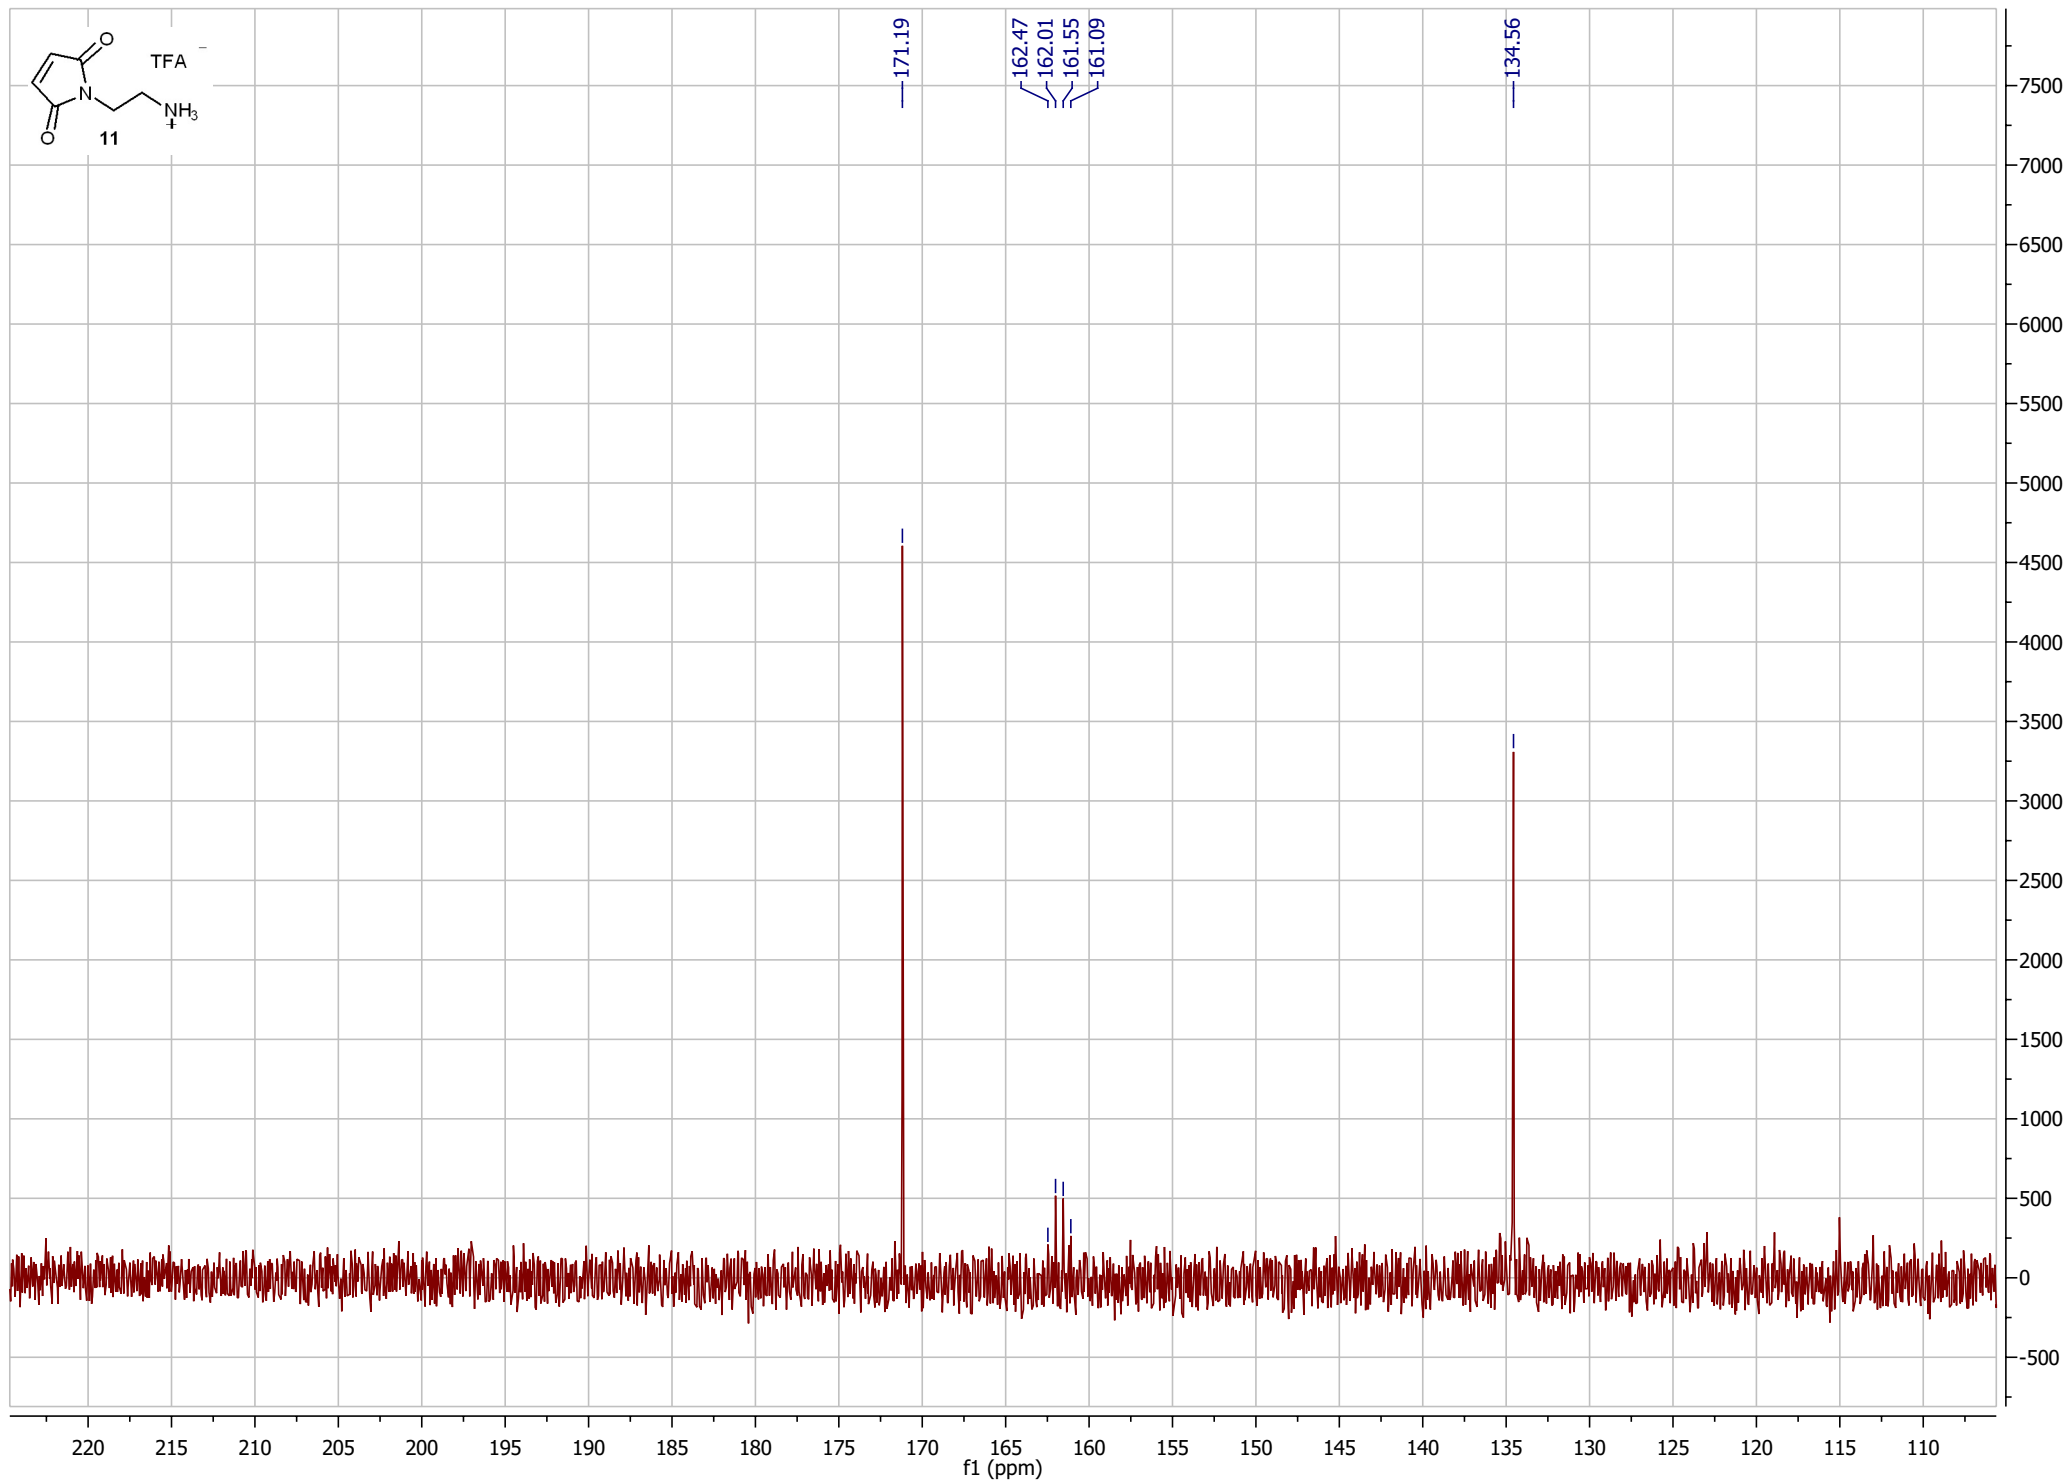

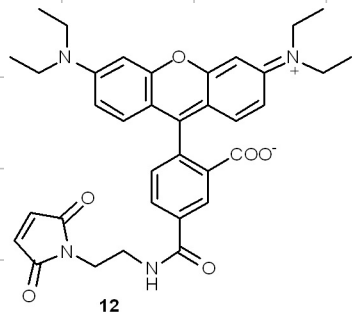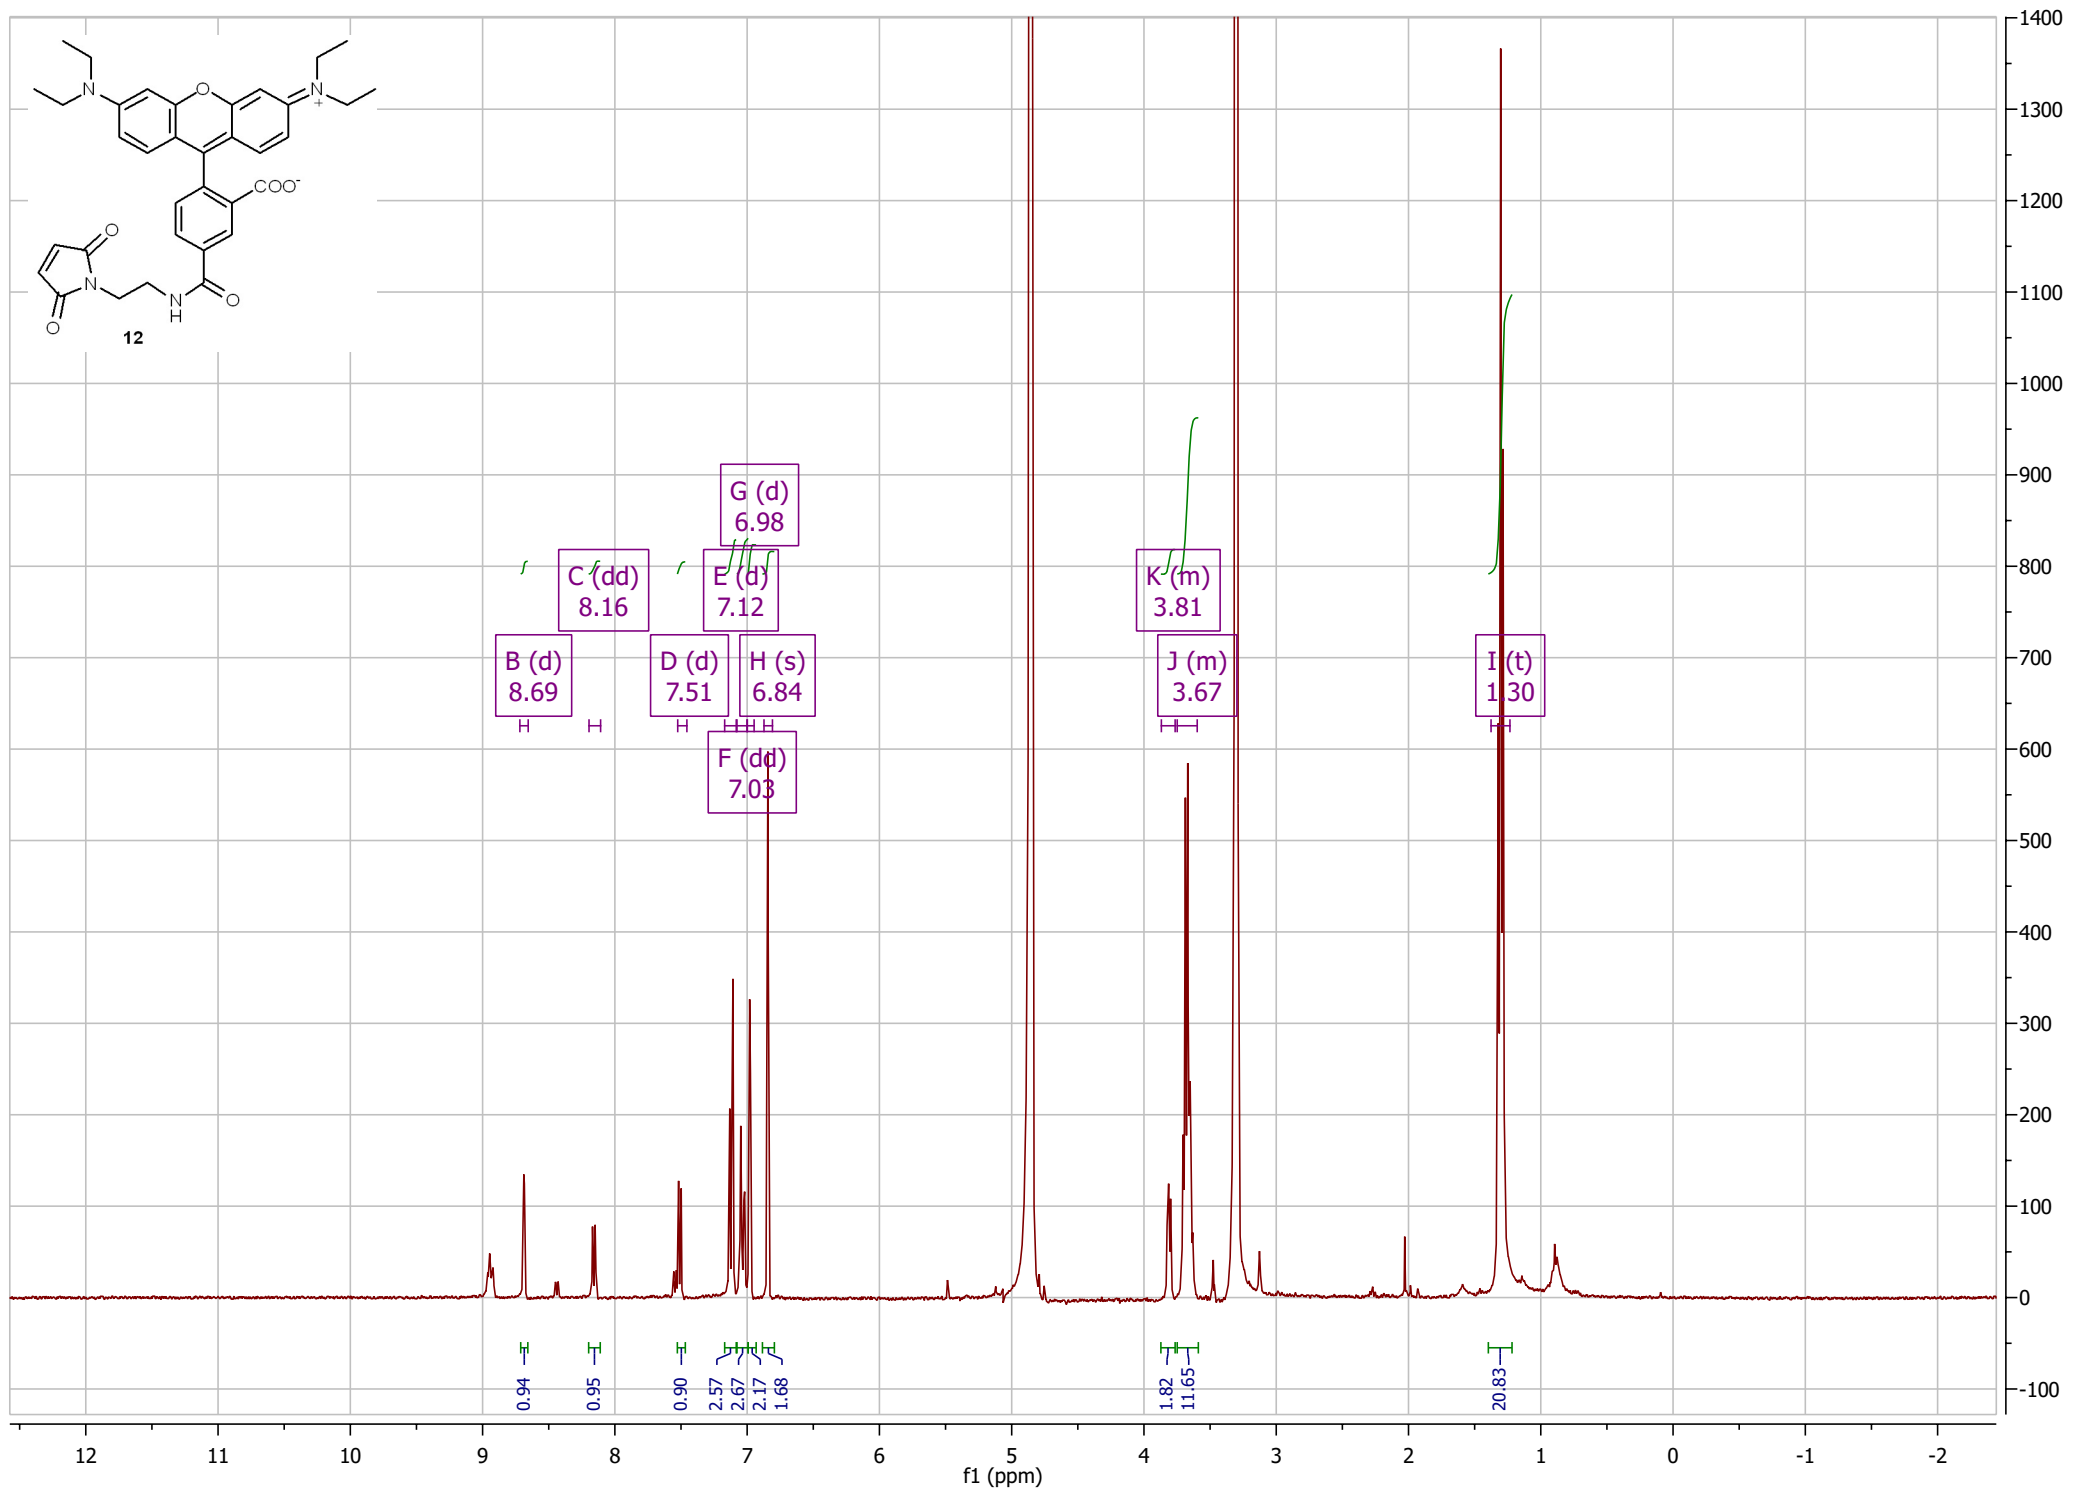

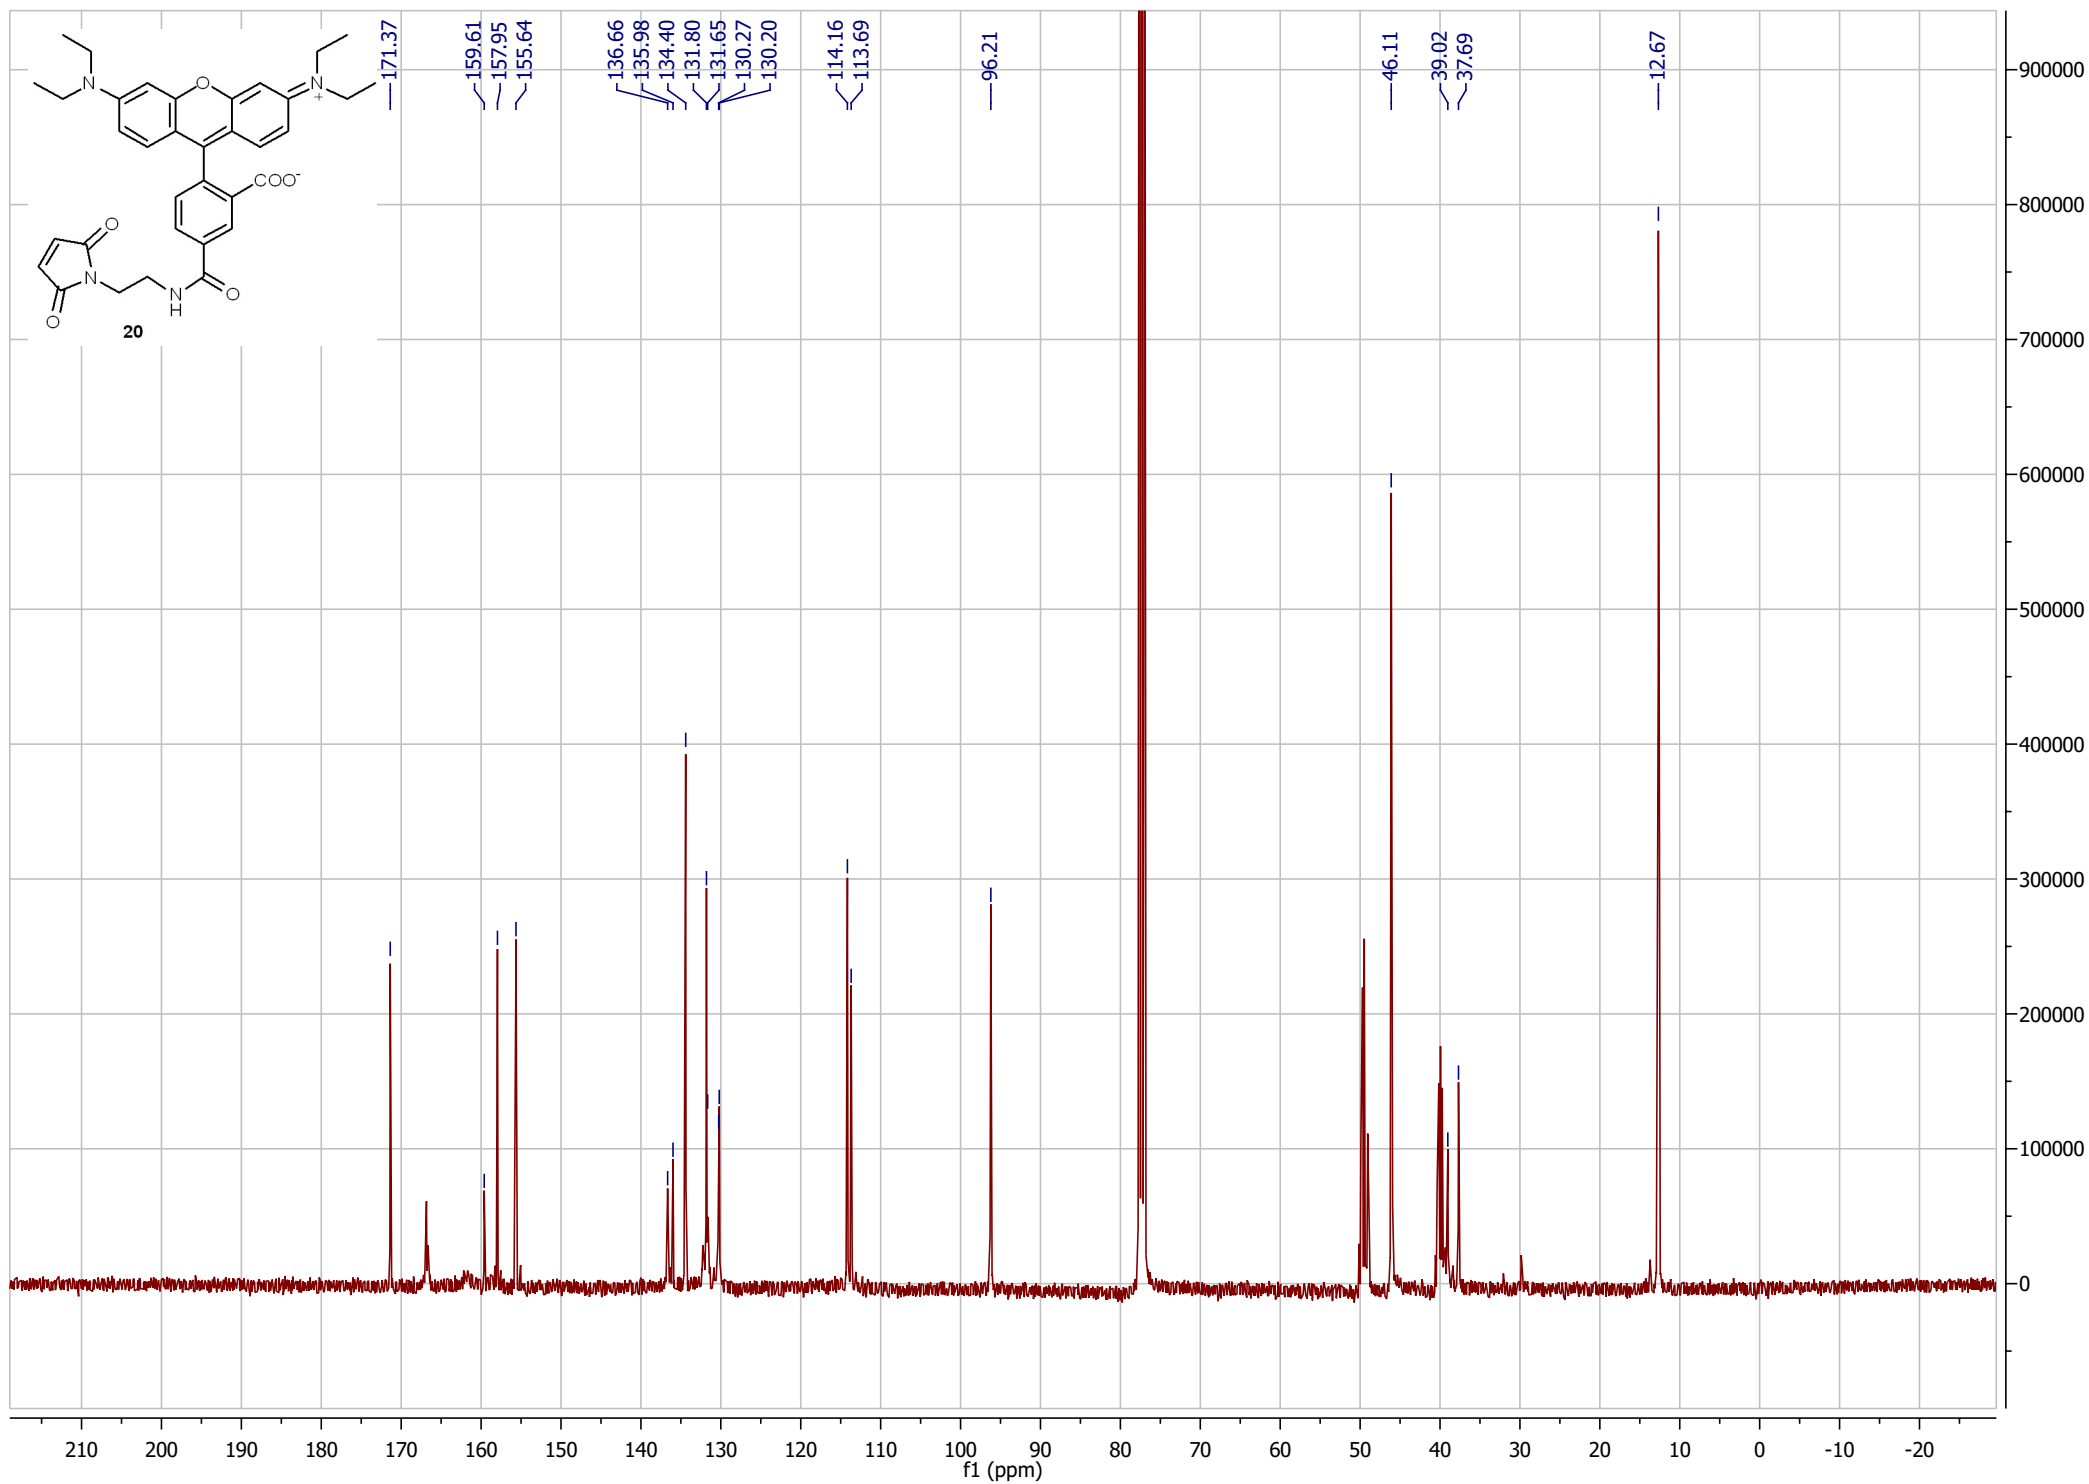



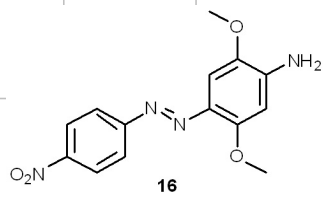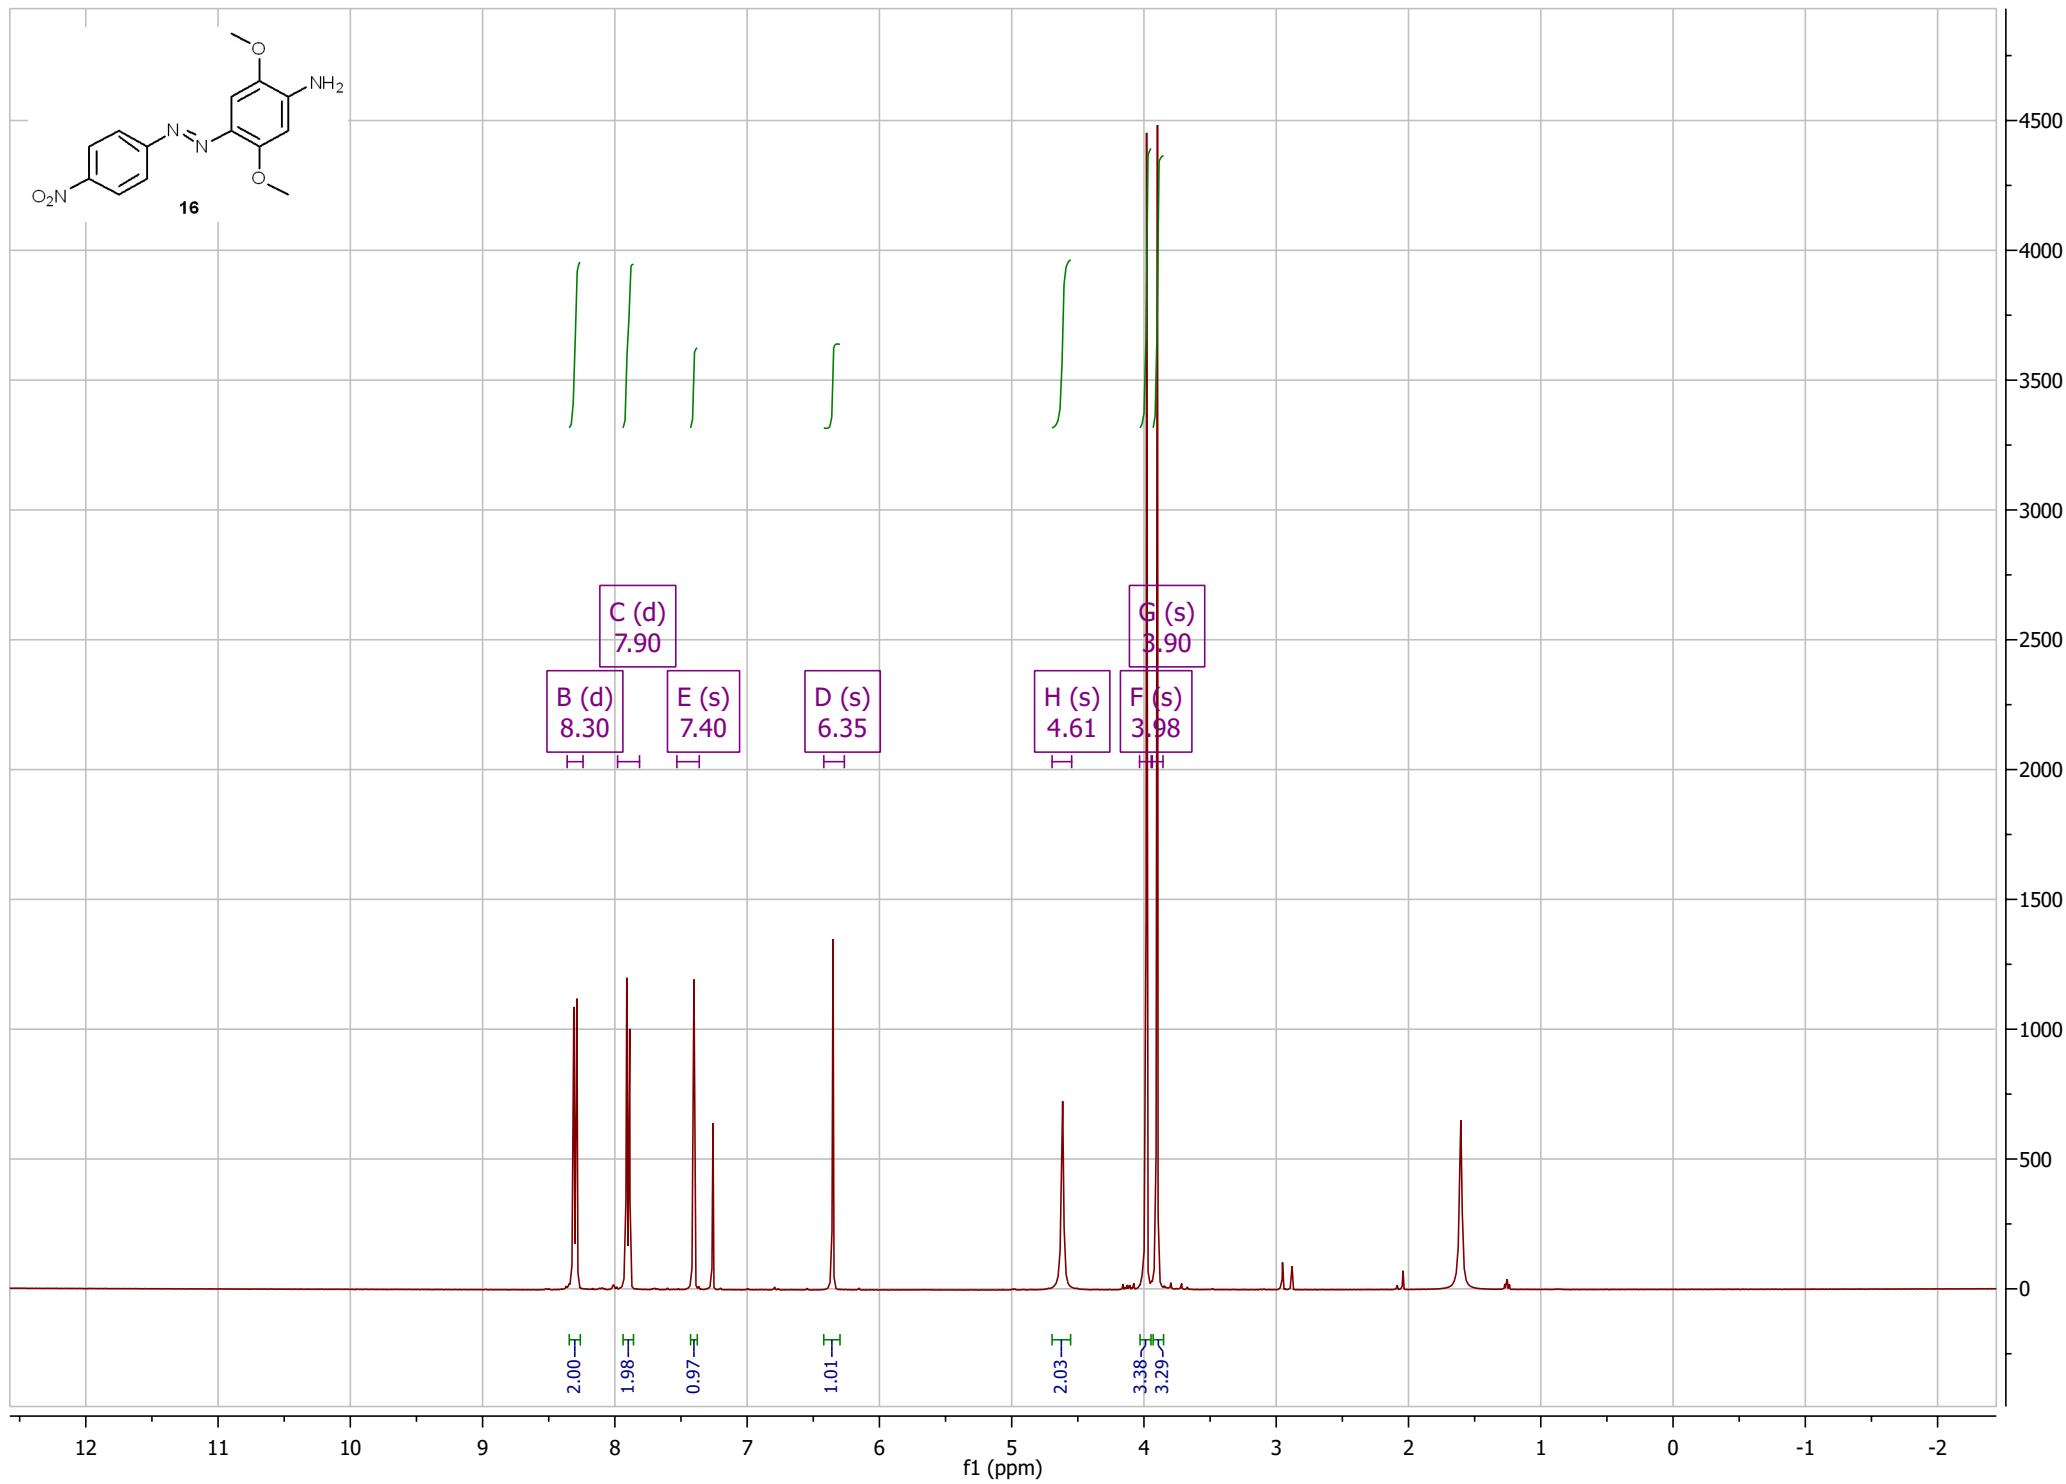

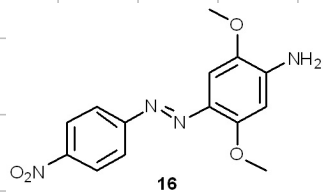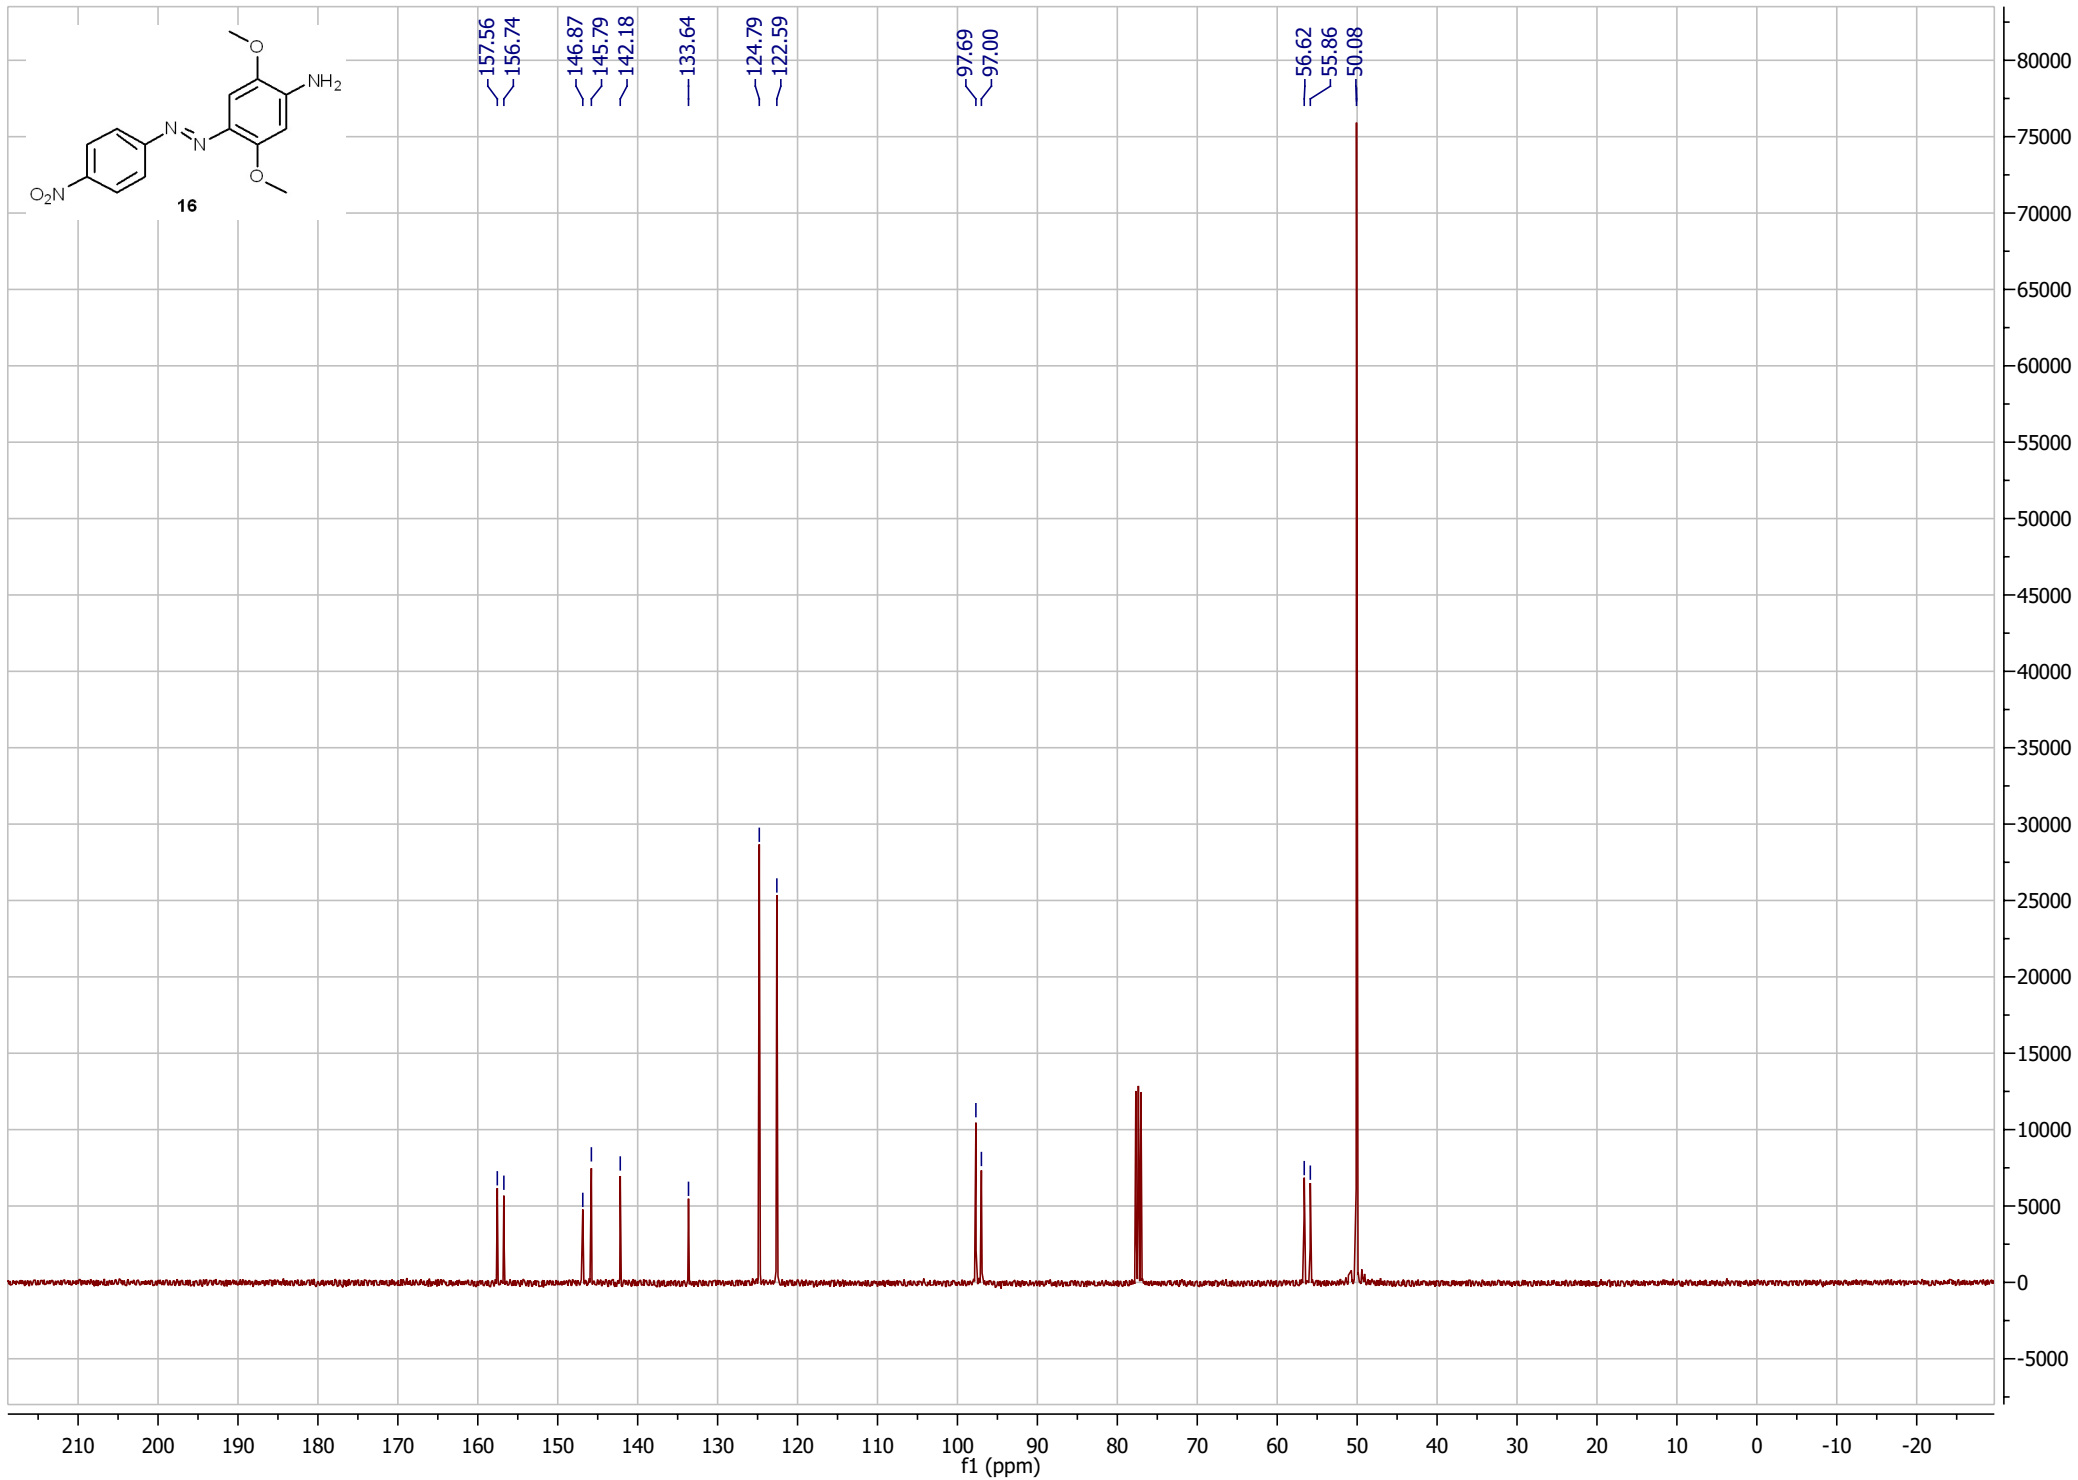

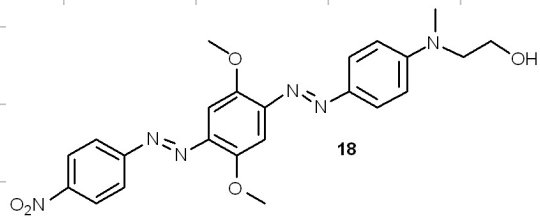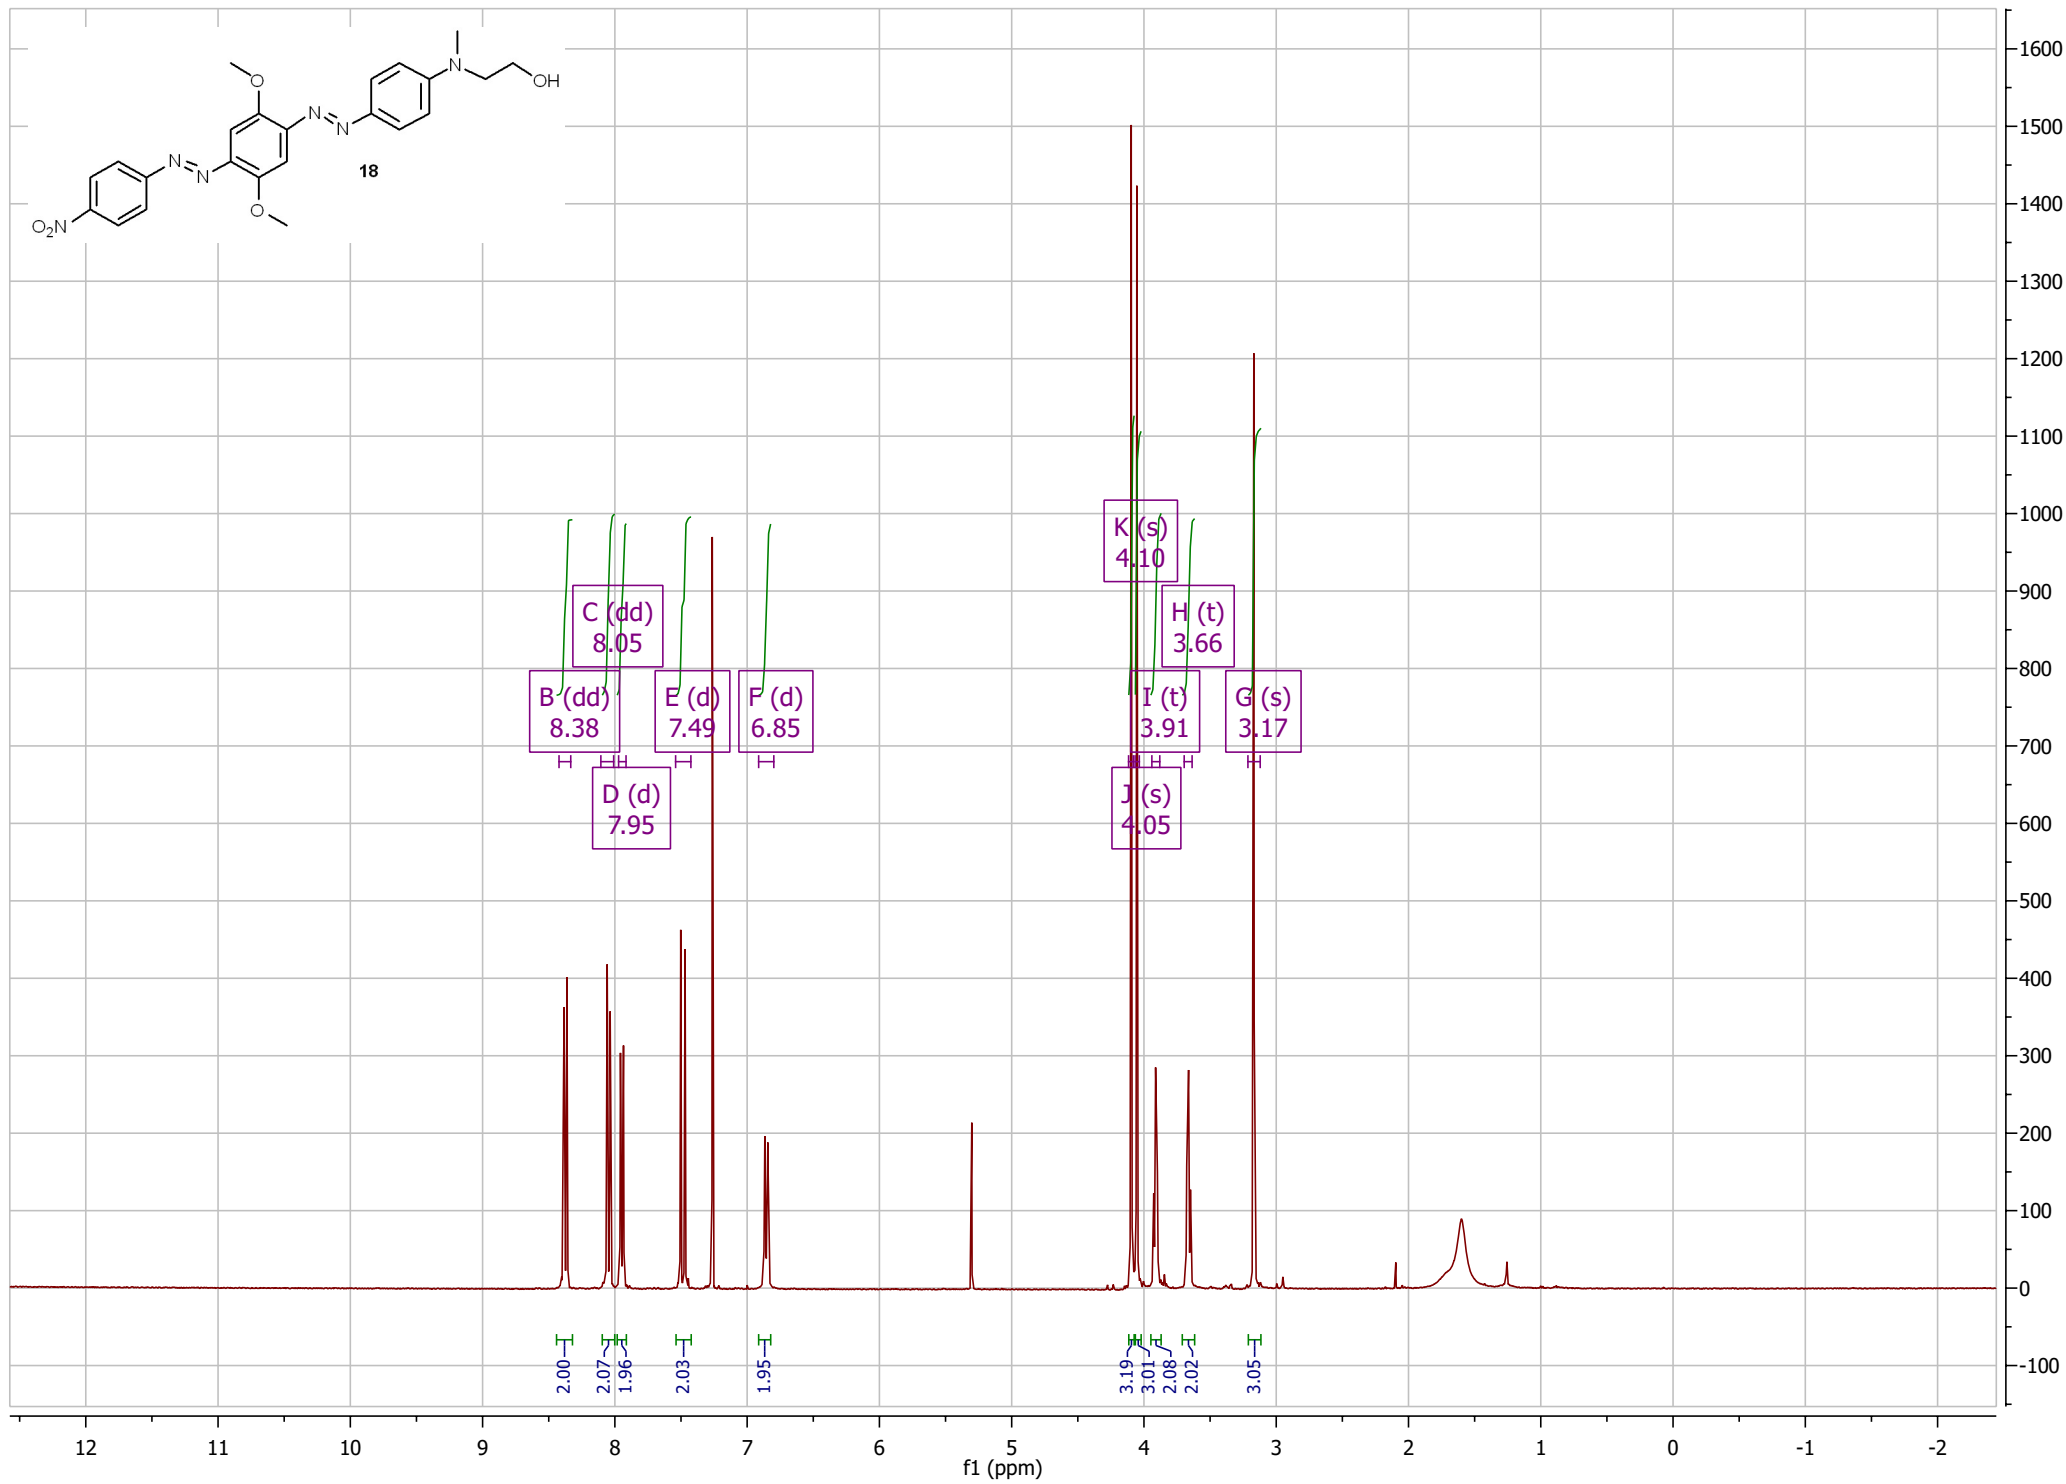

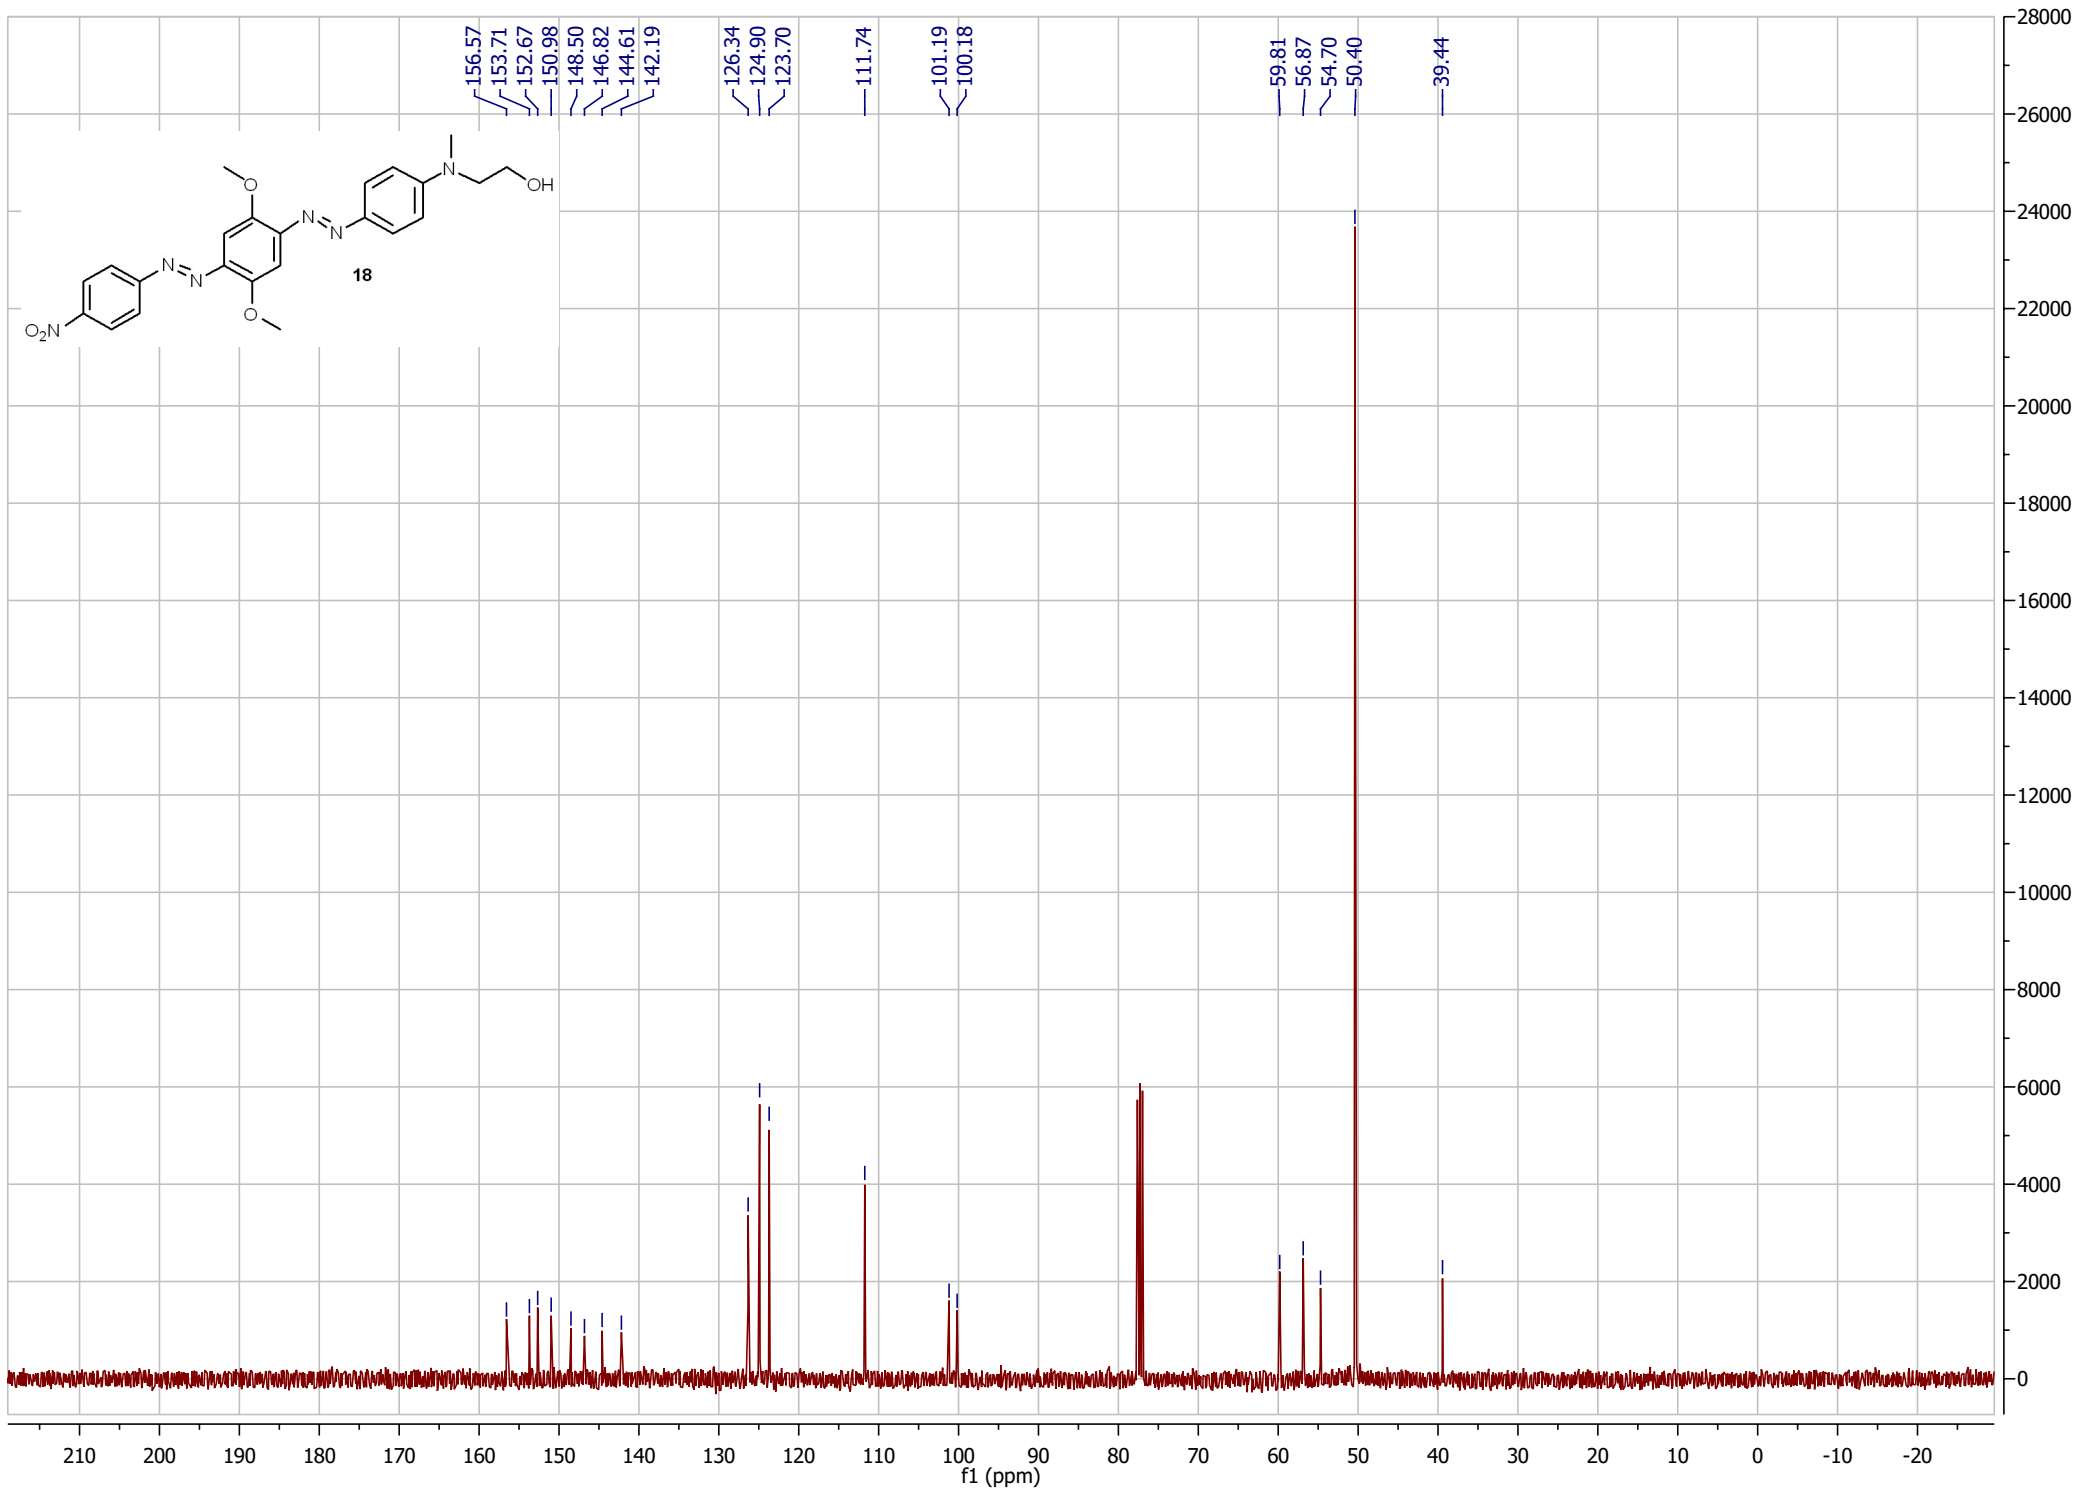

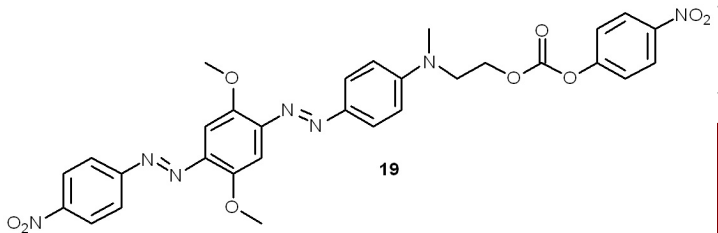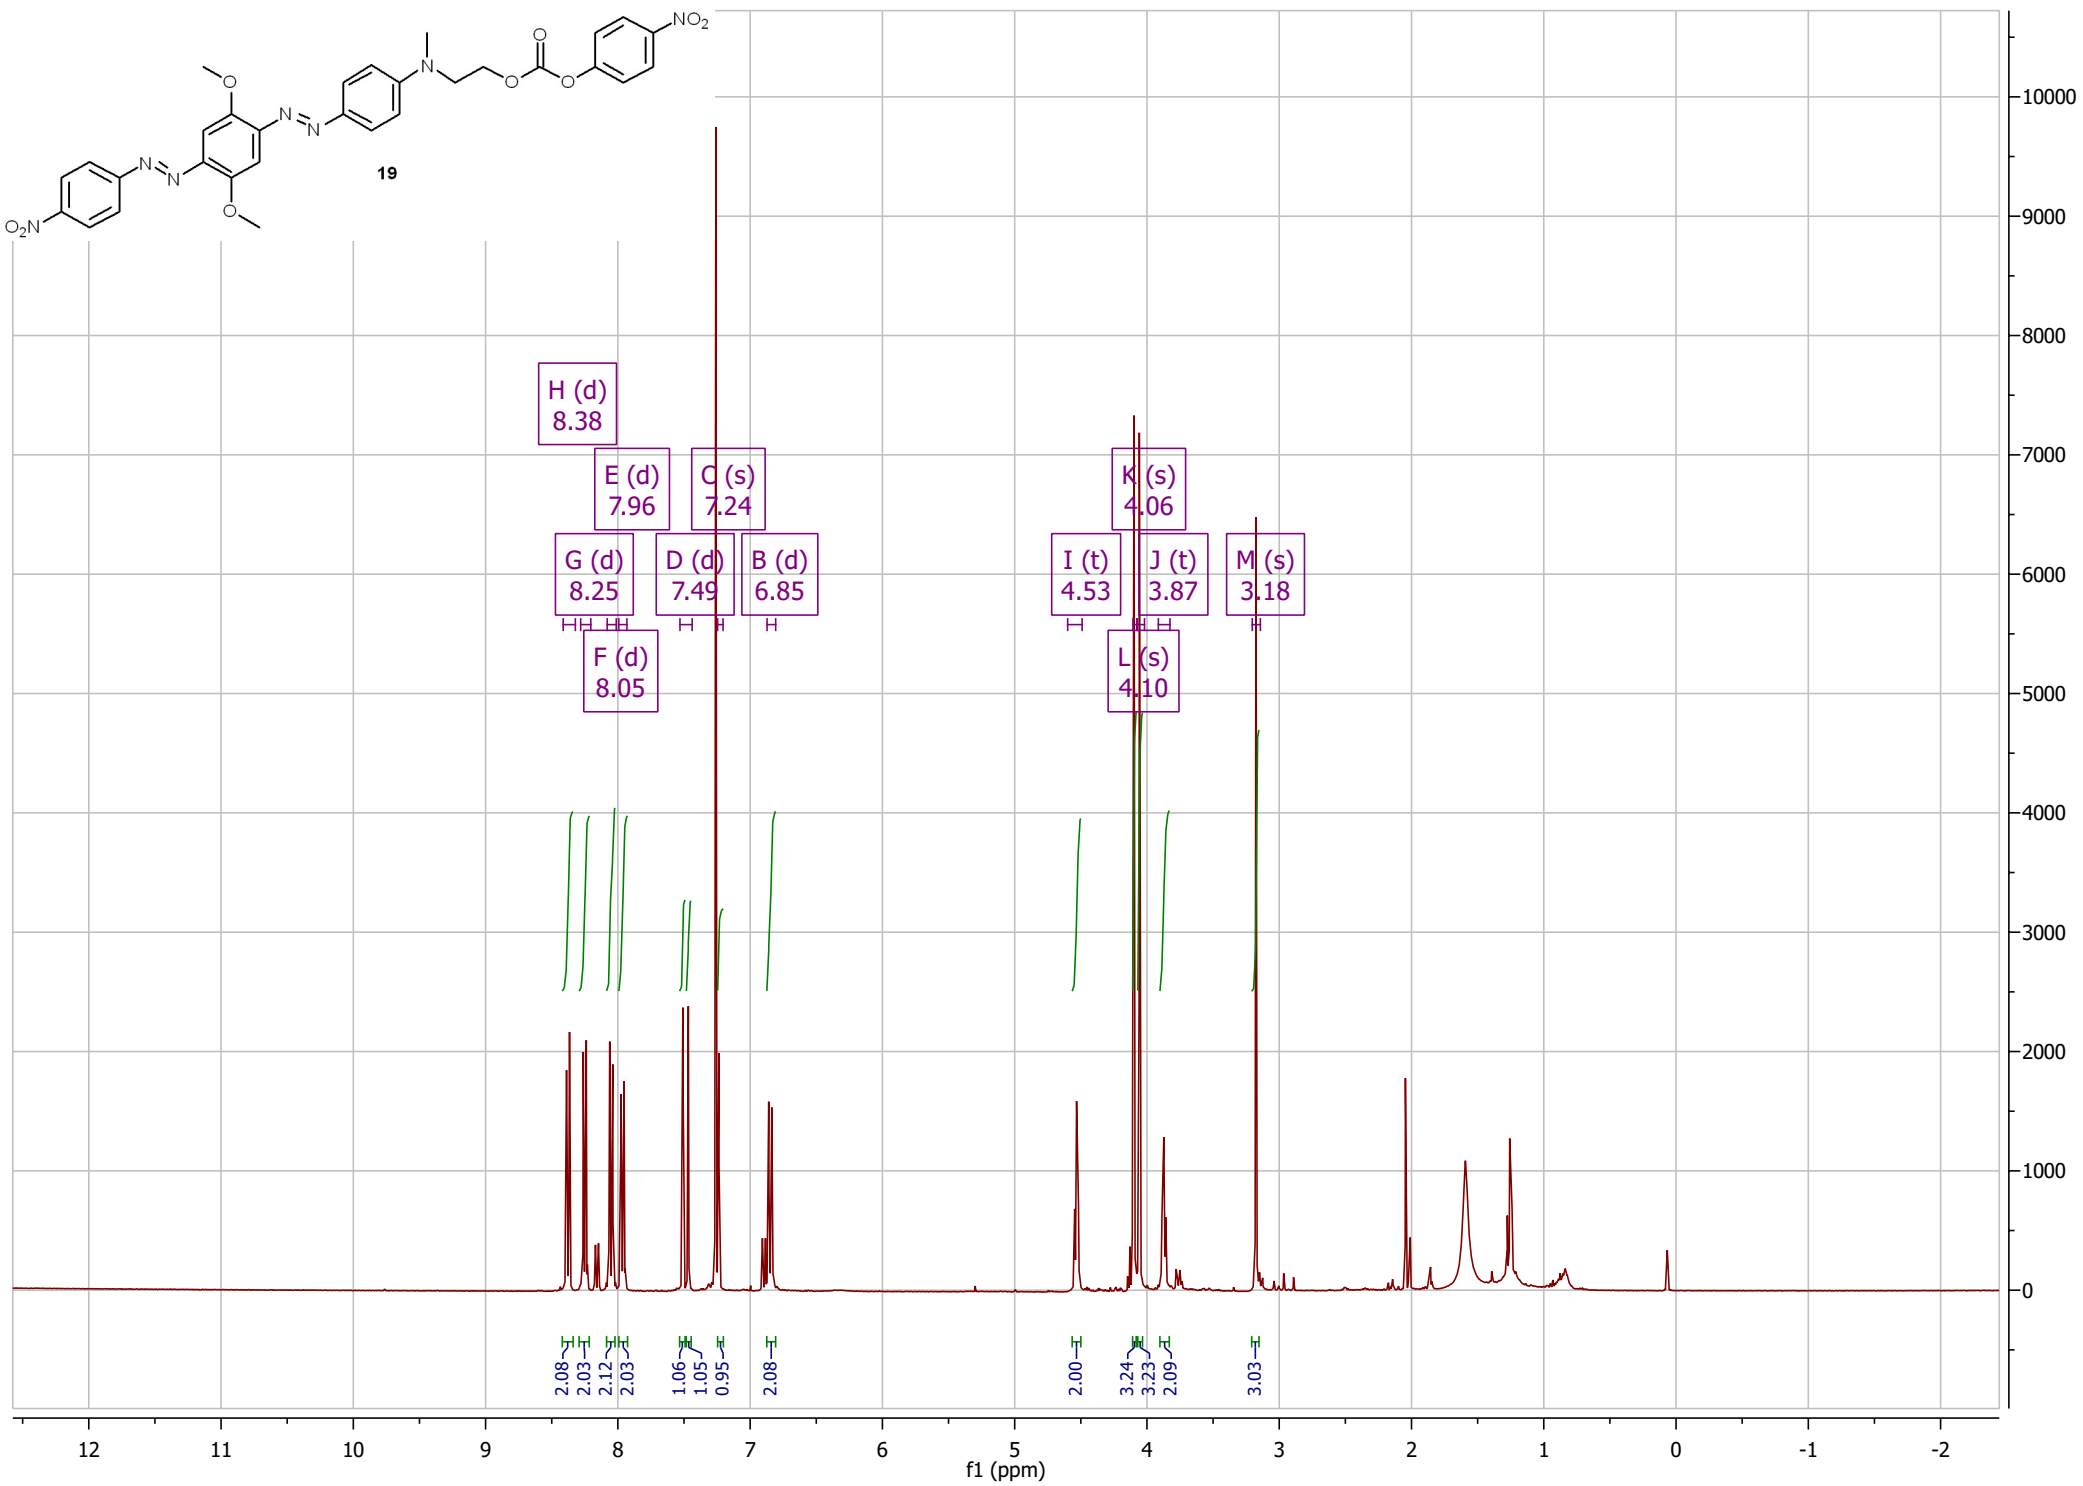

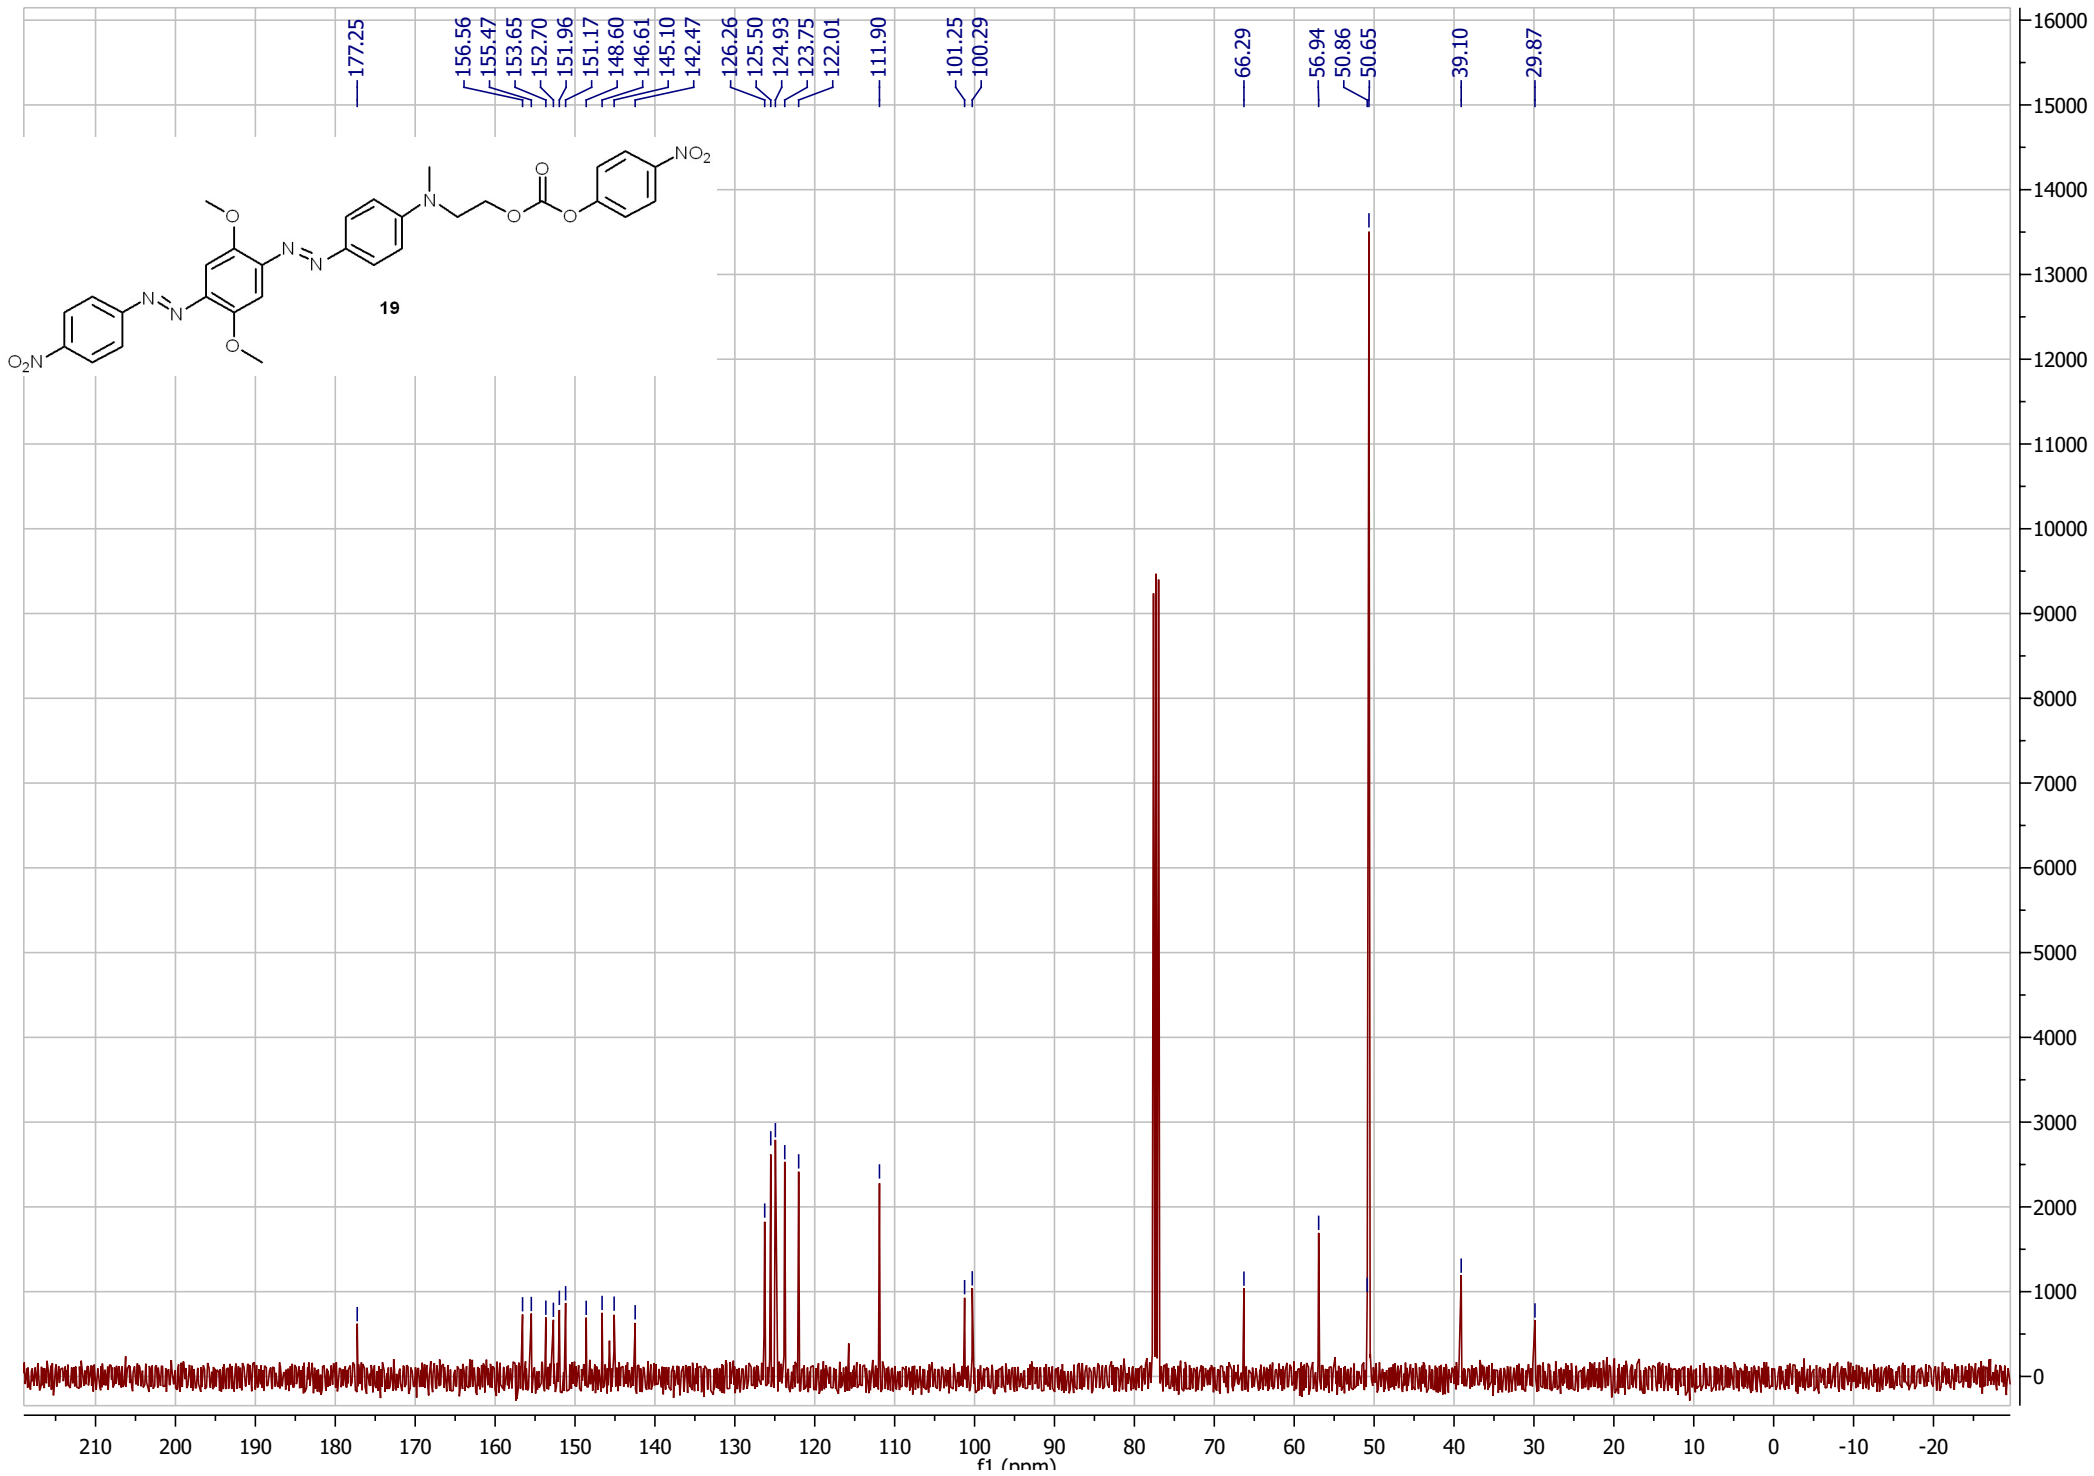

Supplement: NIHMS232696-supplement-Supporting_Info.pdf [file NIHMS232696-supplement-Supporting_Info.pdf]
